# Supplementary material for: Deciphering context-specific gene programs from single-cell and spatial transcriptomics data with DeCEP
Source: HighWire-hosted journal article supplement (doi:10.1101/gr.279689.124), 2025-08-21
Supplement: Supplemental_Table_S1.xlsx [file Supplemental_Table_S1.xlsx]

## Sheet: Sheet1
Supplemental Table S1. The feature genes of each tumor keratinocyte cluster in the cSCC scRNA-seq dataset.
Yellow fill indicates significantly high expression of the 10 TME-related genes (shown in Supplemental Fig. S26A) across various cell clusters.
gene	p_val	avg_log2FC	pct.1	pct.2	p_val_adj	cluster
EEF1A1	5.15398e-64	1.10069	0.994	0.952	1.72251e-59	0
SNHG25	8.22777e-56	1.29707	0.972	0.693	2.7498e-51	0
COX7C	2.22786e-49	1.22659	0.95	0.755	7.44573e-45	0
PHGDH	1.08964e-47	1.01224	0.811	0.284	3.64167e-43	0
ALDH3A1	1.15472e-47	0.915107	0.656	0.145	3.85918e-43	0
NQO1	1.30936e-44	0.972928	0.706	0.2	4.37601e-40	0
UQCRQ	1.75162e-44	1.20443	0.933	0.768	5.8541e-40	0
SLC25A5	2.06951e-44	1.03491	0.95	0.759	6.9165e-40	0
POLR2L	3.20711e-44	0.960135	0.978	0.791	1.07185e-39	0
SNHG19	2.82479e-43	1.04689	0.756	0.261	9.44074e-39	0
HINT1	5.32299e-43	1.12369	0.939	0.732	1.779e-38	0
SNHG8	5.35184e-43	1.09695	0.9	0.599	1.78864e-38	0
MGST1	1.55056e-42	1.32543	0.817	0.348	5.18214e-38	0
TOMM7	2.59949e-42	0.991629	0.95	0.761	8.68775e-38	0
POSTN	7.1071e-42	1.83216	0.75	0.209	2.37526e-37	0
HMGN3	1.49684e-41	0.908429	0.783	0.314	5.00258e-37	0
PPIA	9.48617e-40	0.742647	1	0.901	3.17037e-35	0
TMA7	2.29803e-39	0.890759	0.967	0.789	7.68025e-35	0
NACA	2.861e-39	0.849059	0.983	0.871	9.56174e-35	0
COX7B	3.6633e-39	0.8703	0.933	0.755	1.22431e-34	0
AKR1B10	4.73237e-39	1.30273	0.822	0.477	1.5816e-34	0
ATP5ME	7.03224e-39	0.89778	0.967	0.801	2.35024e-34	0
KRT15	8.32201e-39	1.12213	0.717	0.246	2.7813e-34	0
MT1X	1.07196e-38	1.67967	0.922	0.61	3.58259e-34	0
FAU	1.55772e-38	0.744106	0.994	0.856	5.20605e-34	0
ADH7	3.39934e-38	0.632117	0.533	0.099	1.13609e-33	0
PTMA	6.59324e-38	1.00316	0.989	0.848	2.20353e-33	0
COX6C	1.18855e-37	0.740809	0.978	0.821	3.97224e-33	0
EEF1B2	2.35467e-37	0.814964	0.983	0.867	7.86954e-33	0
SLC25A6	2.39607e-37	0.894522	0.939	0.706	8.0079e-33	0
COX5B	4.65843e-37	1.0185	0.939	0.746	1.55689e-32	0
ZFAS1	7.77807e-37	0.777429	0.911	0.691	2.59951e-32	0
ALDH2	1.17888e-36	0.870641	0.911	0.612	3.93993e-32	0
AKR1C2	1.86187e-36	0.686453	0.678	0.22	6.22257e-32	0
COX4I1	7.78148e-36	0.875449	0.961	0.764	2.60065e-31	0
CA2	3.12759e-35	1.21883	0.817	0.496	1.04527e-30	0
COX7A2	3.61725e-35	0.932963	0.917	0.706	1.20892e-30	0
CDHR1	4.14082e-35	0.432992	0.433	0.059	1.3839e-30	0
LGALS7B	6.33121e-35	0.92175	0.994	0.918	2.11595e-30	0
NDUFA1	6.77735e-35	0.821414	0.922	0.677	2.26506e-30	0
SNHG9	6.85838e-35	0.812236	0.828	0.408	2.29214e-30	0
ATP5MC3	1.02834e-34	0.73902	0.933	0.683	3.4368e-30	0
LGALS7	1.21823e-34	0.930837	0.983	0.844	4.07144e-30	0
BTF3	3.07042e-34	0.786926	0.972	0.821	1.02616e-29	0
H2AFZ	3.94659e-34	1.09982	0.883	0.555	1.31899e-29	0
UBA52	4.34664e-34	0.61705	0.989	0.881	1.45269e-29	0
SERF2	5.30172e-34	0.547733	0.994	0.853	1.77189e-29	0
DBI	6.55406e-34	0.956405	0.989	0.855	2.19043e-29	0
ATP5MG	1.09749e-33	0.839409	0.928	0.762	3.66792e-29	0
DAPL1	1.6611e-33	1.19714	0.856	0.505	5.55155e-29	0
APCDD1	2.34202e-33	1.21169	0.933	0.58	7.82726e-29	0
NMU	8.59817e-33	0.752058	0.811	0.372	2.87359e-28	0
ATP5MC2	2.17338e-32	0.805557	0.906	0.718	7.26364e-28	0
RACK1	2.41515e-32	0.625796	0.983	0.885	8.07168e-28	0
SOSTDC1	3.38083e-32	0.385621	0.339	0.03	1.12991e-27	0
EIF3L	6.66833e-32	0.799645	0.911	0.624	2.22862e-27	0
ATP5PF	7.33462e-32	0.787434	0.878	0.661	2.4513e-27	0
COPS9	9.23577e-32	0.875545	0.889	0.693	3.08669e-27	0
ATP5MD	6.51233e-31	0.776018	0.956	0.784	2.17648e-26	0
TPT1	1.11665e-30	0.435242	0.994	0.947	3.73197e-26	0
NDUFB1	8.83957e-30	0.769347	0.894	0.702	2.95427e-25	0
GSTA4	1.40728e-29	0.73685	0.694	0.312	4.70328e-25	0
ATP5IF1	3.95985e-29	0.742973	0.906	0.697	1.32342e-24	0
HIGD2A	5.35894e-29	0.746156	0.822	0.426	1.79101e-24	0
UQCR11	1.09856e-28	0.654543	0.967	0.78	3.67148e-24	0
IFT57	1.45757e-28	0.363767	0.45	0.087	4.87136e-24	0
SNRPD2	1.58445e-28	0.793879	0.922	0.686	5.29538e-24	0
COMMD6	1.71639e-28	0.858906	0.9	0.661	5.73634e-24	0
APRT	1.73891e-28	0.812856	0.894	0.677	5.81161e-24	0
SNX7	1.98467e-28	0.328263	0.361	0.048	6.63295e-24	0
OST4	4.8722e-28	0.630485	0.922	0.686	1.62834e-23	0
LDHB	5.77337e-28	0.339295	0.622	0.197	1.92952e-23	0
DHRS4	7.92528e-28	0.381938	0.506	0.124	2.64871e-23	0
COX6B1	8.522e-28	0.698518	0.939	0.768	2.84814e-23	0
UQCRH	2.13476e-27	0.786917	0.894	0.702	7.13458e-23	0
EIF3K	3.09736e-27	0.589392	0.872	0.647	1.03517e-22	0
LAMTOR4	3.42275e-27	0.757462	0.867	0.564	1.14392e-22	0
NDUFB2	3.61918e-27	0.674571	0.928	0.69	1.20957e-22	0
TSPO	4.47244e-27	0.597934	0.989	0.846	1.49473e-22	0
UQCRB	8.66162e-27	0.693933	0.906	0.757	2.8948e-22	0
ATP5MC1	1.08205e-26	0.748251	0.839	0.562	3.61633e-22	0
ITGAE	1.23306e-26	0.481404	0.556	0.165	4.12103e-22	0
PSAT1	1.45717e-26	0.720108	0.639	0.262	4.87002e-22	0
CYCS	1.50762e-26	0.487882	0.9	0.668	5.03861e-22	0
GSTP1	3.04636e-26	0.635276	0.994	0.899	1.01812e-21	0
CRNDE	3.99908e-26	0.49031	0.556	0.17	1.33653e-21	0
ATP5MPL	5.08618e-26	0.693328	0.928	0.754	1.69985e-21	0
CHCHD10	6.49628e-26	0.261333	0.5	0.128	2.17112e-21	0
ATP5MF	7.14455e-26	0.817623	0.911	0.688	2.38778e-21	0
GPX4	9.65379e-26	0.667692	0.922	0.676	3.22639e-21	0
DSC3	1.35507e-25	0.59529	0.956	0.81	4.52877e-21	0
ELOB	1.6562e-25	0.521015	0.967	0.791	5.5352e-21	0
ATP5PO	3.02724e-25	0.699012	0.867	0.677	1.01173e-20	0
HMGN2	3.72067e-25	0.967042	0.9	0.637	1.24348e-20	0
CHCHD2	6.70725e-25	0.695774	0.95	0.745	2.24163e-20	0
MRPL41	7.16293e-25	0.627924	0.8	0.498	2.39392e-20	0
TIMM8B	7.86983e-25	0.551656	0.883	0.683	2.63018e-20	0
DGUOK-AS1	8.91958e-25	0.280392	0.344	0.055	2.98101e-20	0
NDUFA2	9.2736e-25	0.654148	0.772	0.479	3.09933e-20	0
EIF3E	1.08201e-24	0.673922	0.894	0.645	3.6162e-20	0
KRT10	1.56098e-24	0.804826	1	0.982	5.21695e-20	0
GPX2	1.72193e-24	0.59492	0.656	0.294	5.75488e-20	0
ATP1B3	2.06012e-24	0.760179	0.944	0.729	6.88514e-20	0
RBP1	3.74826e-24	0.567346	0.644	0.248	1.25271e-19	0
BEX3	4.29351e-24	0.558819	0.778	0.388	1.43493e-19	0
COL3A1	4.74862e-24	2.0242	0.978	0.642	1.58704e-19	0
SLIRP	5.29133e-24	0.649181	0.894	0.661	1.76841e-19	0
GAMT	5.64834e-24	0.311681	0.311	0.043	1.88773e-19	0
OAT	6.04496e-24	0.711692	0.756	0.404	2.02029e-19	0
PLAC9	6.23053e-24	0.38783	0.294	0.035	2.0823e-19	0
MINOS1	7.65274e-24	0.620737	0.856	0.642	2.55762e-19	0
MRPL23	8.15526e-24	0.570709	0.75	0.402	2.72557e-19	0
SNHG7	1.08265e-23	0.523995	0.65	0.266	3.61833e-19	0
NDUFA13	1.27178e-23	0.645418	0.922	0.729	4.25041e-19	0
NDUFB11	1.34531e-23	0.547739	0.872	0.592	4.49617e-19	0
ATP5F1A	1.74144e-23	0.579388	0.928	0.722	5.82006e-19	0
NDUFAF8	1.84858e-23	0.639439	0.689	0.332	6.17814e-19	0
NDUFS5	5.38958e-23	0.612669	0.917	0.727	1.80125e-18	0
NDUFB6	6.05608e-23	0.718652	0.772	0.477	2.024e-18	0
MAF	6.96249e-23	0.597725	0.883	0.642	2.32693e-18	0
NDUFB9	1.23274e-22	0.655417	0.922	0.702	4.11994e-18	0
HNRNPA1	1.72149e-22	0.737253	0.956	0.745	5.7534e-18	0
NDUFS6	1.89884e-22	0.676618	0.872	0.633	6.34612e-18	0
SNHG18	1.92578e-22	0.280193	0.311	0.048	6.43614e-18	0
SKP1	2.02166e-22	0.598101	0.906	0.716	6.7566e-18	0
CSRP2	2.12422e-22	0.958335	0.739	0.42	7.09936e-18	0
WDR83OS	4.06352e-22	0.768943	0.878	0.663	1.35807e-17	0
PRDX1	4.83538e-22	0.730656	0.944	0.789	1.61603e-17	0
PXMP4	5.82917e-22	0.557266	0.633	0.27	1.94817e-17	0
PYCARD	6.42967e-22	0.656988	0.889	0.693	2.14886e-17	0
MFAP4	8.65264e-22	0.452054	0.239	0.023	2.8918e-17	0
C12orf57	1.02701e-21	0.721947	0.856	0.557	3.43237e-17	0
TIMM13	1.22289e-21	0.635158	0.883	0.656	4.08702e-17	0
NHP2	1.27334e-21	0.625649	0.867	0.61	4.25563e-17	0
SLC25A3	1.64496e-21	0.539028	0.961	0.759	5.49761e-17	0
FABP5	2.64288e-21	0.855177	1	0.973	8.83275e-17	0
COX8A	2.70564e-21	0.544035	0.944	0.805	9.04253e-17	0
RBBP4	3.00692e-21	0.594308	0.689	0.321	1.00494e-16	0
MRPS26	3.25763e-21	0.469733	0.633	0.268	1.08873e-16	0
TRIR	3.40486e-21	0.613084	0.883	0.668	1.13794e-16	0
AKR1C1	3.67699e-21	0.612957	0.661	0.332	1.22889e-16	0
ZNF706	4.16578e-21	0.5382	0.878	0.693	1.39225e-16	0
LSM5	4.26978e-21	0.619485	0.75	0.438	1.427e-16	0
PHB2	4.29358e-21	0.601283	0.833	0.578	1.43496e-16	0
MZT2B	4.36553e-21	0.636244	0.917	0.691	1.459e-16	0
NDUFA4	5.18895e-21	0.508186	0.922	0.785	1.7342e-16	0
ID1	5.67937e-21	0.405496	0.811	0.463	1.8981e-16	0
IMPDH1	6.81756e-21	0.433765	0.6	0.234	2.2785e-16	0
UXT	6.88037e-21	0.562699	0.761	0.418	2.29949e-16	0
CUTA	8.445e-21	0.61184	0.811	0.537	2.8224e-16	0
PBX1	9.48829e-21	0.287427	0.394	0.092	3.17108e-16	0
SPARC	1.08043e-20	1.39612	0.956	0.651	3.61089e-16	0
PMEL	1.09113e-20	0.775967	0.611	0.264	3.64666e-16	0
HNRNPH1	1.10048e-20	0.530601	0.872	0.603	3.67791e-16	0
PEBP1	1.22755e-20	0.519805	0.872	0.667	4.10258e-16	0
TPD52L1	1.30926e-20	0.507535	0.683	0.376	4.37567e-16	0
NDUFB7	1.34034e-20	0.635422	0.911	0.686	4.47956e-16	0
TCEAL8	1.41146e-20	0.259999	0.522	0.176	4.71724e-16	0
RBM3	1.52173e-20	0.487423	0.967	0.803	5.08577e-16	0
OAZ1	1.70082e-20	0.551533	0.978	0.814	5.6843e-16	0
PPA2	1.79883e-20	0.497346	0.717	0.379	6.01187e-16	0
STMN1	1.82104e-20	0.27951	0.717	0.36	6.0861e-16	0
PCNA	1.9233e-20	0.6268	0.717	0.369	6.42787e-16	0
NAA38	2.05303e-20	0.683376	0.839	0.576	6.86144e-16	0
NOP53	2.1631e-20	0.364771	0.867	0.628	7.22931e-16	0
NUPR1	2.91092e-20	0.619304	0.739	0.411	9.72859e-16	0
RNF7	3.77155e-20	0.582655	0.817	0.557	1.26049e-15	0
HNRNPAB	4.29539e-20	0.544109	0.878	0.629	1.43556e-15	0
ISOC2	4.521e-20	0.529083	0.672	0.321	1.51096e-15	0
NDUFA11	5.02063e-20	0.545415	0.939	0.722	1.67795e-15	0
MYL6B	5.25746e-20	0.382582	0.5	0.17	1.7571e-15	0
FAM104B	5.3097e-20	0.28538	0.5	0.167	1.77456e-15	0
ARL6IP4	5.59105e-20	0.508556	0.817	0.537	1.86859e-15	0
SH3BGRL	6.11789e-20	0.524305	0.744	0.418	2.04466e-15	0
REEP5	6.74921e-20	0.440913	0.889	0.615	2.25565e-15	0
PTTG1	7.88126e-20	0.594001	0.689	0.349	2.634e-15	0
YBX1	7.8835e-20	0.498463	0.906	0.628	2.63474e-15	0
SELENOW	8.1709e-20	0.522647	0.928	0.725	2.7308e-15	0
ZNHIT1	8.74478e-20	0.619037	0.789	0.486	2.92259e-15	0
EEF2	9.62857e-20	0.38487	0.978	0.842	3.21797e-15	0
GSTM3	9.66079e-20	0.33185	0.389	0.099	3.22873e-15	0
LGALS3	1.2772e-19	0.728299	0.939	0.778	4.26852e-15	0
DDT	1.49026e-19	0.843445	0.833	0.574	4.98059e-15	0
H3F3A	1.62367e-19	0.403812	0.983	0.878	5.42647e-15	0
SNRPE	1.96484e-19	0.637752	0.839	0.564	6.56668e-15	0
BLOC1S1	1.99169e-19	0.542954	0.778	0.5	6.65644e-15	0
SNRPG	2.13893e-19	0.623615	0.872	0.626	7.14851e-15	0
ENSA	2.27369e-19	0.564317	0.844	0.647	7.59891e-15	0
C9orf3	2.29531e-19	0.530658	0.761	0.459	7.67116e-15	0
MRPL52	2.37745e-19	0.640017	0.844	0.566	7.94569e-15	0
C19orf48	2.83092e-19	0.489098	0.644	0.289	9.46123e-15	0
EPB41L4A-AS1	3.05631e-19	0.429747	0.539	0.211	1.02145e-14	0
CD248	3.06712e-19	0.439129	0.417	0.115	1.02506e-14	0
EEF1D	3.28696e-19	0.474821	0.956	0.787	1.09854e-14	0
DCTN3	3.40284e-19	0.4499	0.761	0.475	1.13726e-14	0
EIF4B	3.89e-19	0.513934	0.867	0.637	1.30008e-14	0
NDUFA3	3.94862e-19	0.473735	0.9	0.644	1.31967e-14	0
SNRPF	3.95854e-19	0.629832	0.833	0.598	1.32298e-14	0
MDH1	4.11452e-19	0.573008	0.789	0.502	1.37512e-14	0
CKS1B	4.14566e-19	0.498636	0.633	0.285	1.38552e-14	0
ANP32B	4.6281e-19	0.62372	0.817	0.507	1.54676e-14	0
PFDN5	5.08525e-19	0.542581	0.956	0.789	1.69954e-14	0
TYRP1	5.45786e-19	0.747871	0.567	0.225	1.82407e-14	0
JTB	6.03372e-19	0.538938	0.833	0.543	2.01653e-14	0
AP001453.2	6.52389e-19	0.524437	0.75	0.457	2.18035e-14	0
GLUD1	6.76922e-19	0.533703	0.739	0.411	2.26234e-14	0
CIRBP	7.20215e-19	0.685257	0.917	0.674	2.40703e-14	0
SELENOH	8.30984e-19	0.582771	0.811	0.537	2.77723e-14	0
LSM7	8.48847e-19	0.599879	0.828	0.576	2.83693e-14	0
VAV3	8.55881e-19	0.375622	0.611	0.273	2.86044e-14	0
ZSCAN16-AS1	8.67591e-19	0.370684	0.383	0.101	2.89958e-14	0
FBL	9.43614e-19	0.67039	0.828	0.546	3.15365e-14	0
ATP5PD	9.53864e-19	0.508092	0.894	0.727	3.18791e-14	0
PRDX6	9.86732e-19	0.462513	0.906	0.741	3.29776e-14	0
S100A16	1.02565e-18	0.479879	0.967	0.842	3.42784e-14	0
TPRKB	1.44889e-18	0.546364	0.65	0.312	4.84234e-14	0
HNRNPA2B1	1.74277e-18	0.462585	0.95	0.706	5.82451e-14	0
HMGB1	1.74677e-18	0.616682	0.911	0.707	5.83789e-14	0
PIN4	1.84882e-18	0.527986	0.656	0.342	6.17895e-14	0
C12orf75	2.09658e-18	0.30256	0.433	0.128	7.00697e-14	0
TOMM20	2.12777e-18	0.486429	0.839	0.622	7.11122e-14	0
BANF1	2.16006e-18	0.431364	0.728	0.408	7.21912e-14	0
IFI27L2	2.37706e-18	0.458769	0.55	0.216	7.94436e-14	0
PTGS1	2.79839e-18	0.41027	0.656	0.317	9.35248e-14	0
PHPT1	2.9111e-18	0.651613	0.767	0.493	9.72918e-14	0
MRPL33	2.93263e-18	0.452764	0.717	0.388	9.80113e-14	0
ROBO1	3.69163e-18	0.389465	0.6	0.264	1.23378e-13	0
CSKMT	4.15223e-18	0.415015	0.65	0.332	1.38772e-13	0
ATP5F1C	4.63788e-18	0.471935	0.85	0.624	1.55003e-13	0
SNRPB	4.94309e-18	0.528679	0.867	0.598	1.65203e-13	0
PTRHD1	5.3559e-18	0.493792	0.722	0.418	1.79e-13	0
HSPE1	5.4996e-18	0.479324	0.872	0.603	1.83802e-13	0
NDUFB3	5.71625e-18	0.558628	0.789	0.589	1.91043e-13	0
CXCL14	5.86637e-18	0.778019	0.972	0.83	1.9606e-13	0
TRMT112	6.62017e-18	0.613862	0.856	0.647	2.21253e-13	0
COL1A1	7.26889e-18	1.83867	0.967	0.75	2.42933e-13	0
COX6A1	7.40402e-18	0.39295	0.961	0.842	2.4745e-13	0
S100A14	8.1512e-18	0.571486	0.944	0.826	2.72421e-13	0
MIF	8.73666e-18	0.620497	0.894	0.748	2.91988e-13	0
FXYD3	9.21276e-18	0.529085	0.983	0.844	3.079e-13	0
CENPX	1.16655e-17	0.509143	0.733	0.443	3.89874e-13	0
MT1M	1.17543e-17	0.297212	0.244	0.039	3.92839e-13	0
NDUFS8	1.33535e-17	0.530283	0.767	0.484	4.46287e-13	0
PON2	1.35899e-17	0.332552	0.506	0.186	4.54188e-13	0
METTL7A	1.41133e-17	0.38298	0.572	0.234	4.71679e-13	0
TUFM	1.41165e-17	0.453093	0.856	0.59	4.71789e-13	0
BLVRA	1.42444e-17	0.440904	0.611	0.282	4.76061e-13	0
C19orf53	1.45206e-17	0.465865	0.822	0.596	4.85294e-13	0
NUDT5	1.72185e-17	0.403977	0.689	0.363	5.7546e-13	0
NDUFA7	1.85397e-17	0.387514	0.717	0.463	6.19616e-13	0
S100A13	2.13132e-17	0.536576	0.6	0.275	7.1231e-13	0
FRZB	2.13909e-17	0.372259	0.372	0.101	7.14904e-13	0
FGFR3	2.17567e-17	0.494102	0.683	0.381	7.2713e-13	0
PAICS	2.18932e-17	0.370813	0.706	0.36	7.31692e-13	0
SRP14	2.61064e-17	0.494385	0.889	0.739	8.72504e-13	0
NFIC	2.66321e-17	0.436764	0.683	0.335	8.9007e-13	0
PARK7	2.71319e-17	0.340836	0.867	0.551	9.06776e-13	0
TMEM256	3.39278e-17	0.477205	0.728	0.449	1.1339e-12	0
SNRPC	3.52376e-17	0.629306	0.789	0.493	1.17768e-12	0
NSA2	3.73008e-17	0.559229	0.739	0.482	1.24663e-12	0
CKLF	4.83371e-17	0.338475	0.522	0.204	1.61548e-12	0
TP53TG1	4.86697e-17	0.408964	0.567	0.261	1.62659e-12	0
CENPW	4.92487e-17	0.303555	0.417	0.135	1.64594e-12	0
LSM3	5.13696e-17	0.51298	0.817	0.534	1.71682e-12	0
SRP19	5.59928e-17	0.448259	0.678	0.367	1.87134e-12	0
MRPL34	6.01685e-17	0.44176	0.678	0.34	2.01089e-12	0
C8orf59	6.12897e-17	0.514971	0.783	0.55	2.04836e-12	0
SOD1	6.1307e-17	0.493874	0.878	0.624	2.04894e-12	0
SMDT1	6.16184e-17	0.403368	0.767	0.505	2.05935e-12	0
ALKBH7	6.19713e-17	0.464651	0.728	0.422	2.07114e-12	0
RANBP1	6.24431e-17	0.583761	0.744	0.447	2.08691e-12	0
ANAPC16	6.26472e-17	0.528839	0.733	0.42	2.09373e-12	0
ATP5PB	6.27323e-17	0.502222	0.856	0.615	2.09658e-12	0
EXOSC5	6.49291e-17	0.345625	0.467	0.165	2.17e-12	0
UQCC3	6.55419e-17	0.442482	0.75	0.434	2.19048e-12	0
TCEA3	6.8102e-17	0.314856	0.333	0.083	2.27604e-12	0
CBR1	7.0724e-17	0.587194	0.844	0.642	2.36367e-12	0
APOE	7.16203e-17	0.714501	0.556	0.23	2.39362e-12	0
COL6A1	7.40625e-17	1.21978	0.883	0.551	2.47524e-12	0
SF3B6	8.16128e-17	0.592034	0.844	0.64	2.72758e-12	0
COL1A2	9.25144e-17	1.72299	0.972	0.745	3.09192e-12	0
PDCD5	1.04238e-16	0.421718	0.839	0.596	3.48375e-12	0
ANAPC11	1.04501e-16	0.549005	0.811	0.645	3.49253e-12	0
SFRP2	1.18136e-16	0.661976	0.506	0.197	3.94823e-12	0
ERH	1.26621e-16	0.470093	0.767	0.454	4.23181e-12	0
SEC61B	1.2677e-16	0.515849	0.917	0.715	4.23678e-12	0
UBL5	1.35573e-16	0.482926	0.906	0.754	4.53099e-12	0
CYB5A	1.48875e-16	0.540343	0.633	0.358	4.97554e-12	0
PET100	1.81653e-16	0.439821	0.894	0.699	6.07104e-12	0
TP53AIP1	1.91654e-16	0.261067	0.422	0.142	6.40526e-12	0
NEDD8	2.14412e-16	0.475675	0.889	0.706	7.16585e-12	0
SPINT1-AS1	2.15678e-16	0.255799	0.472	0.174	7.20818e-12	0
STMP1	2.27102e-16	0.467623	0.789	0.555	7.58998e-12	0
EIF3H	2.33317e-16	0.305364	0.861	0.679	7.7977e-12	0
MRPS34	2.43348e-16	0.395032	0.806	0.489	8.13293e-12	0
NDUFC1	2.62478e-16	0.472853	0.883	0.739	8.77228e-12	0
PSMA2	2.73471e-16	0.532037	0.85	0.622	9.13967e-12	0
PNKD	2.9555e-16	0.33973	0.544	0.225	9.87758e-12	0
MRPS11	3.00371e-16	0.388945	0.622	0.301	1.00387e-11	0
TIMM10	3.51156e-16	0.462253	0.728	0.434	1.1736e-11	0
MZT2A	3.83862e-16	0.70781	0.867	0.605	1.28291e-11	0
PTPRZ1	3.87056e-16	0.40715	0.694	0.397	1.29358e-11	0
EEF1E1	4.03879e-16	0.346305	0.517	0.202	1.3498e-11	0
PCBP2	4.28311e-16	0.311178	0.944	0.745	1.43146e-11	0
CBX5	4.54134e-16	0.437299	0.544	0.222	1.51776e-11	0
ALDH7A1	4.6332e-16	0.37485	0.539	0.23	1.54846e-11	0
TMEM258	4.79244e-16	0.475048	0.861	0.629	1.60168e-11	0
CRABP2	5.06033e-16	0.486454	0.928	0.771	1.69121e-11	0
ID2	5.17475e-16	0.26032	0.656	0.319	1.72945e-11	0
ESD	5.18779e-16	0.379717	0.706	0.387	1.73381e-11	0
RPA3	5.41412e-16	0.262278	0.572	0.245	1.80945e-11	0
SIVA1	5.44892e-16	0.481972	0.678	0.397	1.82108e-11	0
MRPL57	5.61494e-16	0.431504	0.806	0.599	1.87657e-11	0
SF3B5	5.82072e-16	0.461361	0.833	0.61	1.94534e-11	0
ZNF32	5.90096e-16	0.250553	0.372	0.11	1.97216e-11	0
LRRC75A	6.38201e-16	0.62937	0.433	0.163	2.13293e-11	0
CAMTA1	6.43185e-16	0.428142	0.572	0.271	2.14959e-11	0
AKR1B1	6.63829e-16	0.331247	0.417	0.133	2.21858e-11	0
TCEAL9	6.98776e-16	0.322468	0.739	0.363	2.33538e-11	0
HNRNPA3	7.35138e-16	0.483744	0.906	0.72	2.45691e-11	0
NOP16	7.75962e-16	0.377332	0.672	0.365	2.59334e-11	0
LSM8	8.16565e-16	0.423461	0.622	0.321	2.72904e-11	0
PDCD4	8.74193e-16	0.491221	0.828	0.564	2.92164e-11	0
ILF2	1.08326e-15	0.557083	0.789	0.544	3.62038e-11	0
MYL6	1.12056e-15	0.43867	1	0.855	3.74503e-11	0
MDH2	1.16617e-15	0.495564	0.861	0.631	3.89747e-11	0
HNRNPK	1.18745e-15	0.374955	0.956	0.766	3.96858e-11	0
IMPDH2	1.33964e-15	0.399463	0.883	0.582	4.4772e-11	0
NPM1	1.39863e-15	0.594382	0.928	0.739	4.67435e-11	0
ENY2	1.40582e-15	0.434126	0.733	0.443	4.69838e-11	0
HCFC1R1	1.40762e-15	0.448868	0.561	0.259	4.70442e-11	0
THBS2	1.42541e-15	0.546202	0.661	0.351	4.76387e-11	0
MGST2	1.54341e-15	0.358936	0.644	0.355	5.15822e-11	0
DNAJC19	1.69676e-15	0.435446	0.622	0.319	5.67074e-11	0
BCKDHB	1.7537e-15	0.278551	0.322	0.083	5.86105e-11	0
NDUFB8	1.76592e-15	0.419525	0.839	0.672	5.90189e-11	0
LARS	1.82387e-15	0.319746	0.55	0.241	6.09556e-11	0
SYCE1L	2.285e-15	0.315518	0.422	0.149	7.6367e-11	0
MRPL36	2.28738e-15	0.409472	0.711	0.42	7.64464e-11	0
TSTD1	2.39342e-15	0.545603	0.783	0.59	7.99904e-11	0
LOX	2.43028e-15	0.3139	0.311	0.076	8.12225e-11	0
COX14	2.43481e-15	0.465947	0.717	0.457	8.13739e-11	0
SET	2.69916e-15	0.473329	0.878	0.64	9.02087e-11	0
MCM4	3.23098e-15	0.329797	0.533	0.23	1.07982e-10	0
H2AFV	3.23937e-15	0.495746	0.722	0.434	1.08263e-10	0
UBE2D2	3.88945e-15	0.333905	0.756	0.495	1.29989e-10	0
ETFB	4.21988e-15	0.477482	0.794	0.498	1.41033e-10	0
RPA1	4.87064e-15	0.428014	0.711	0.394	1.62782e-10	0
GTF2A2	5.52506e-15	0.354058	0.7	0.402	1.84653e-10	0
LAMTOR2	6.21466e-15	0.395942	0.722	0.449	2.077e-10	0
GATM	6.45943e-15	0.322079	0.45	0.17	2.1588e-10	0
COMTD1	6.54972e-15	0.398746	0.644	0.351	2.18898e-10	0
NFIB	6.86717e-15	0.293735	0.4	0.131	2.29508e-10	0
HADH	7.19706e-15	0.26213	0.439	0.158	2.40533e-10	0
TNFRSF19	7.68826e-15	0.274514	0.4	0.135	2.56949e-10	0
ECH1	8.09505e-15	0.397133	0.783	0.559	2.70545e-10	0
PCOLCE	8.36354e-15	0.784573	0.428	0.165	2.79518e-10	0
TF	8.62288e-15	0.272636	0.178	0.021	2.88185e-10	0
C6orf48	9.56797e-15	0.337789	0.511	0.218	3.19771e-10	0
NUP155	9.96697e-15	0.287457	0.411	0.14	3.33106e-10	0
GAS6	1.14279e-14	0.406589	0.722	0.401	3.81933e-10	0
TOMM5	1.18259e-14	0.412016	0.694	0.424	3.95233e-10	0
ALDH1A1	1.2317e-14	0.255594	0.244	0.05	4.11647e-10	0
NAP1L1	1.27084e-14	0.322319	0.878	0.606	4.24728e-10	0
NUDT1	1.2763e-14	0.455079	0.578	0.284	4.26551e-10	0
DDB2	1.28764e-14	0.388443	0.378	0.124	4.30341e-10	0
FBLN1	1.33085e-14	0.458165	0.556	0.254	4.44782e-10	0
DEGS1	1.40494e-14	0.493001	0.922	0.771	4.69544e-10	0
GATB	1.44565e-14	0.378186	0.611	0.333	4.83152e-10	0
MRC2	1.53635e-14	0.437716	0.539	0.243	5.13463e-10	0
DMAC1	1.62331e-14	0.481957	0.672	0.388	5.42527e-10	0
FBXW9	1.65623e-14	0.281229	0.333	0.096	5.53528e-10	0
CDC25B	2.50539e-14	0.757605	0.556	0.252	8.37327e-10	0
KRT5	2.76436e-14	0.557439	1	0.959	9.23877e-10	0
SRP9	2.97773e-14	0.442872	0.856	0.592	9.95186e-10	0
KLF5	3.1186e-14	0.424955	0.867	0.7	1.04227e-09	0
KRT1	3.13889e-14	0.53839	1	0.989	1.04905e-09	0
NDUFS7	3.3916e-14	0.505538	0.7	0.45	1.13351e-09	0
RRM2	3.41122e-14	0.470094	0.528	0.236	1.14006e-09	0
APEX1	3.4413e-14	0.40516	0.667	0.381	1.15012e-09	0
CWC15	3.52368e-14	0.396781	0.744	0.495	1.17765e-09	0
S100A4	3.72129e-14	0.374604	0.867	0.566	1.24369e-09	0
NUBP2	3.7668e-14	0.298794	0.639	0.34	1.2589e-09	0
TALDO1	3.88696e-14	0.36053	0.872	0.681	1.29906e-09	0
TXNDC17	4.07538e-14	0.524729	0.956	0.759	1.36203e-09	0
DPM3	4.16701e-14	0.330786	0.689	0.388	1.39265e-09	0
MT1G	4.68646e-14	0.715664	0.278	0.071	1.56626e-09	0
GTF3A	4.69952e-14	0.421408	0.728	0.418	1.57063e-09	0
DCTPP1	5.22544e-14	0.250134	0.467	0.183	1.7464e-09	0
PCNP	5.37031e-14	0.374147	0.739	0.449	1.79481e-09	0
COPS6	6.00002e-14	0.349637	0.7	0.41	2.00527e-09	0
IMPA2	6.17232e-14	0.501563	0.817	0.66	2.06285e-09	0
ARF5	6.56682e-14	0.360916	0.667	0.395	2.1947e-09	0
TKT	6.71604e-14	0.477416	0.733	0.445	2.24457e-09	0
VDAC2	6.81841e-14	0.392084	0.85	0.656	2.27878e-09	0
POLR2E	6.82533e-14	0.468609	0.739	0.502	2.28109e-09	0
TRPS1	7.23708e-14	0.269264	0.439	0.163	2.41871e-09	0
NT5C	8.04291e-14	0.322254	0.633	0.34	2.68802e-09	0
SUCLG1	8.05982e-14	0.342611	0.75	0.489	2.69367e-09	0
HSD17B10	8.81192e-14	0.393647	0.778	0.535	2.94503e-09	0
NDUFAB1	9.40658e-14	0.518024	0.806	0.574	3.14377e-09	0
VDAC1	9.79995e-14	0.422868	0.794	0.598	3.27524e-09	0
RAN	1.08581e-13	0.430389	0.922	0.755	3.62889e-09	0
NDUFC2	1.14201e-13	0.441416	0.883	0.679	3.81671e-09	0
METTL26	1.24848e-13	0.367062	0.711	0.383	4.17255e-09	0
SELENOP	1.29525e-13	0.603532	0.65	0.348	4.32885e-09	0
SMIM29	1.36271e-13	0.317532	0.55	0.257	4.55432e-09	0
EID1	1.46718e-13	0.295096	0.583	0.277	4.90347e-09	0
PFN1	1.48329e-13	0.465491	0.983	0.851	4.9573e-09	0
SMIM30	1.51867e-13	0.277789	0.456	0.186	5.07553e-09	0
TIMM17B	1.56064e-13	0.395862	0.583	0.3	5.21581e-09	0
FAM98B	1.56595e-13	0.291522	0.433	0.163	5.23356e-09	0
ATP5F1E	1.65687e-13	0.41151	0.978	0.849	5.53741e-09	0
COL18A1	1.71237e-13	0.540763	0.811	0.48	5.72292e-09	0
GCSH	1.75691e-13	0.389833	0.472	0.209	5.87177e-09	0
COMMD4	1.8922e-13	0.270741	0.656	0.349	6.32391e-09	0
MRPS28	1.98642e-13	0.295366	0.5	0.215	6.6388e-09	0
ABRACL	2.09706e-13	0.379824	0.583	0.291	7.00858e-09	0
SLC38A1	2.18718e-13	0.382264	0.717	0.42	7.30979e-09	0
SNRPD3	2.20692e-13	0.344151	0.811	0.612	7.37574e-09	0
UQCR10	2.29208e-13	0.250225	0.889	0.75	7.66036e-09	0
BZW2	2.38776e-13	0.304379	0.633	0.333	7.98012e-09	0
POLR2F	2.40057e-13	0.369757	0.739	0.473	8.02294e-09	0
TXNDC5	2.88461e-13	0.569791	0.622	0.312	9.64066e-09	0
EWSR1	3.13499e-13	0.415765	0.828	0.592	1.04774e-08	0
HNRNPM	3.27882e-13	0.347324	0.839	0.58	1.09581e-08	0
NOTCH3	3.52179e-13	0.363725	0.75	0.512	1.17702e-08	0
PIK3R1	3.66989e-13	0.333586	0.339	0.112	1.22652e-08	0
EIF4A2	3.76202e-13	0.285267	0.678	0.387	1.2573e-08	0
COX5A	3.82589e-13	0.378318	0.861	0.704	1.27865e-08	0
GAPDH	4.41117e-13	0.406538	0.994	0.917	1.47426e-08	0
FIS1	4.41521e-13	0.300039	0.828	0.582	1.47561e-08	0
HINT2	4.74879e-13	0.309572	0.556	0.275	1.58709e-08	0
SLC7A1	4.85187e-13	0.556231	0.717	0.429	1.62154e-08	0
SUB1	4.86567e-13	0.550306	0.933	0.757	1.62616e-08	0
AURKAIP1	5.13541e-13	0.516485	0.828	0.622	1.71631e-08	0
MRPL12	5.22973e-13	0.356416	0.733	0.463	1.74783e-08	0
GAS2L1	5.32256e-13	0.454328	0.65	0.346	1.77885e-08	0
DNAJC4	5.35322e-13	0.325271	0.433	0.174	1.7891e-08	0
MRPS15	5.83248e-13	0.347621	0.683	0.436	1.94927e-08	0
COMP	6.36241e-13	0.927768	0.411	0.165	2.12638e-08	0
DUT	6.89062e-13	0.416266	0.678	0.367	2.30291e-08	0
DIMT1	7.29859e-13	0.31274	0.55	0.271	2.43926e-08	0
NME1	7.58975e-13	0.415453	0.822	0.619	2.53657e-08	0
HSPA9	8.60145e-13	0.410348	0.739	0.548	2.87469e-08	0
QTRT1	8.85624e-13	0.265892	0.383	0.14	2.95984e-08	0
LSM4	9.2305e-13	0.398399	0.7	0.475	3.08492e-08	0
ATP1A1	1.00653e-12	0.546749	0.844	0.612	3.36391e-08	0
ARL2BP	1.0313e-12	0.417004	0.606	0.339	3.4467e-08	0
OLFML3	1.03552e-12	0.378204	0.25	0.064	3.46083e-08	0
TXNL4A	1.0512e-12	0.43409	0.767	0.523	3.51322e-08	0
ERP29	1.09881e-12	0.618955	0.767	0.509	3.67232e-08	0
BCL11A	1.18024e-12	0.254547	0.422	0.163	3.94446e-08	0
NCL	1.21145e-12	0.483445	0.883	0.638	4.04878e-08	0
GBP6	1.26508e-12	0.312047	0.544	0.255	4.22802e-08	0
MRPS12	1.3635e-12	0.341489	0.7	0.443	4.55694e-08	0
EIF2A	1.45365e-12	0.375944	0.644	0.378	4.85825e-08	0
PDLIM4	1.47074e-12	0.330511	0.606	0.31	4.91536e-08	0
MRPL43	1.50797e-12	0.267326	0.7	0.459	5.03979e-08	0
LIMCH1	1.64199e-12	0.258766	0.444	0.176	5.48769e-08	0
NEIL2	1.64698e-12	0.252791	0.444	0.181	5.50439e-08	0
C22orf39	1.66842e-12	0.356233	0.572	0.293	5.57603e-08	0
NFE2L2	1.81159e-12	0.351252	0.822	0.622	6.05453e-08	0
ARPC3	1.87138e-12	0.415707	0.9	0.718	6.25433e-08	0
TYMS	1.8991e-12	0.289935	0.428	0.174	6.34699e-08	0
ALAD	1.9033e-12	0.298372	0.406	0.165	6.36102e-08	0
FAM210B	1.98662e-12	0.321647	0.656	0.404	6.63949e-08	0
DGCR6L	2.00546e-12	0.339434	0.567	0.298	6.70246e-08	0
CCT7	2.12332e-12	0.389109	0.789	0.559	7.09634e-08	0
TP53	2.27446e-12	0.324844	0.517	0.234	7.60147e-08	0
MRPS21	2.30524e-12	0.397735	0.867	0.667	7.70436e-08	0
OXA1L	2.36223e-12	0.347066	0.694	0.436	7.8948e-08	0
ACAA2	2.38938e-12	0.296821	0.6	0.344	7.98555e-08	0
BIRC5	2.49445e-12	0.36429	0.394	0.154	8.33671e-08	0
EIF2S3	2.53724e-12	0.409728	0.717	0.447	8.47972e-08	0
MFF	2.55068e-12	0.353965	0.639	0.349	8.52464e-08	0
AC010642.2	2.69408e-12	0.255085	0.522	0.25	9.00389e-08	0
COL6A2	2.69726e-12	1.01081	0.811	0.518	9.01452e-08	0
ALG14	2.70742e-12	0.289498	0.394	0.156	9.04846e-08	0
ATP5F1B	2.82199e-12	0.357528	0.894	0.773	9.43137e-08	0
PFDN6	2.84466e-12	0.257644	0.539	0.27	9.50714e-08	0
SRPRB	2.86926e-12	0.407758	0.667	0.376	9.58936e-08	0
ABCE1	2.90389e-12	0.292242	0.589	0.31	9.70509e-08	0
SUMO1	2.92801e-12	0.393867	0.689	0.415	9.7857e-08	0
TBCA	2.98924e-12	0.404863	0.839	0.652	9.99033e-08	0
POLE3	2.99167e-12	0.316049	0.55	0.277	9.99847e-08	0
COA3	3.13192e-12	0.365547	0.728	0.473	1.04672e-07	0
EPHB6	3.2034e-12	0.295022	0.661	0.36	1.07061e-07	0
HAX1	3.21206e-12	0.360631	0.567	0.287	1.0735e-07	0
AQP1	3.26266e-12	0.630396	0.478	0.213	1.09041e-07	0
GLRX5	3.35106e-12	0.292672	0.622	0.335	1.11996e-07	0
FAAP20	3.47958e-12	0.322396	0.711	0.44	1.16291e-07	0
CDCA4	3.49412e-12	0.463537	0.594	0.316	1.16777e-07	0
MRPL37	3.87918e-12	0.391039	0.711	0.47	1.29646e-07	0
NUP88	3.9001e-12	0.284189	0.483	0.216	1.30345e-07	0
MCM6	3.97089e-12	0.282309	0.389	0.147	1.32711e-07	0
HNRNPDL	4.12888e-12	0.439169	0.767	0.512	1.37991e-07	0
CD9	4.16204e-12	0.397163	0.956	0.764	1.39099e-07	0
TOMM22	4.22411e-12	0.456985	0.7	0.48	1.41174e-07	0
CSNK1A1	4.25012e-12	0.268868	0.922	0.787	1.42043e-07	0
RBBP7	4.31866e-12	0.403729	0.661	0.397	1.44334e-07	0
NUCKS1	4.33746e-12	0.458203	0.767	0.504	1.44962e-07	0
CPSF6	4.61033e-12	0.377003	0.572	0.307	1.54082e-07	0
SARAF	4.70295e-12	0.402221	0.828	0.576	1.57177e-07	0
POP5	5.31039e-12	0.2701	0.439	0.183	1.77478e-07	0
POLR2G	5.36782e-12	0.703678	0.722	0.457	1.79398e-07	0
ZNHIT3	5.38756e-12	0.678451	0.589	0.31	1.80058e-07	0
UBE2I	5.4202e-12	0.422998	0.8	0.548	1.81149e-07	0
SMIM4	5.78346e-12	0.32889	0.717	0.465	1.93289e-07	0
ETFA	6.17559e-12	0.424687	0.778	0.518	2.06395e-07	0
HNRNPA0	6.27472e-12	0.377484	0.711	0.436	2.09707e-07	0
COL14A1	6.45203e-12	0.331729	0.161	0.025	2.15633e-07	0
BAG1	7.01286e-12	0.290144	0.767	0.498	2.34377e-07	0
DST	7.61804e-12	0.54308	0.872	0.59	2.54603e-07	0
RRM1	7.8443e-12	0.354683	0.683	0.42	2.62164e-07	0
ERGIC3	7.88113e-12	0.406907	0.8	0.555	2.63395e-07	0
COA4	8.55052e-12	0.389234	0.689	0.404	2.85767e-07	0
HNRNPC	8.67678e-12	0.427516	0.906	0.695	2.89987e-07	0
NCBP2-AS2	8.97633e-12	0.28355	0.533	0.261	2.99998e-07	0
MRPL11	8.98684e-12	0.32833	0.528	0.27	3.00349e-07	0
METTL17	9.11712e-12	0.251394	0.356	0.129	3.04703e-07	0
PLP2	9.29023e-12	0.526448	0.911	0.702	3.10489e-07	0
MRFAP1	9.38497e-12	0.405856	0.806	0.567	3.13655e-07	0
PPP1CA	1.00008e-11	0.305294	0.85	0.663	3.34236e-07	0
FBN1	1.00372e-11	0.666343	0.406	0.168	3.35453e-07	0
DUSP23	1.06645e-11	0.273719	0.706	0.447	3.56417e-07	0
DCAF13	1.13172e-11	0.306816	0.583	0.312	3.78232e-07	0
HSP90AB1	1.17354e-11	0.396863	0.967	0.789	3.92208e-07	0
POLR2J	1.19719e-11	0.344602	0.689	0.47	4.00113e-07	0
COX17	1.22483e-11	0.276146	0.722	0.496	4.0935e-07	0
XRCC6	1.24208e-11	0.386261	0.878	0.654	4.15114e-07	0
CDKN3	1.25386e-11	0.271443	0.3	0.096	4.19053e-07	0
PSMG4	1.38533e-11	0.280302	0.617	0.344	4.6299e-07	0
YWHAZ	1.46217e-11	0.341992	0.978	0.851	4.88672e-07	0
COQ4	1.46684e-11	0.310045	0.594	0.355	4.90231e-07	0
TSPAN3	1.47362e-11	0.344418	0.756	0.47	4.92498e-07	0
HNRNPD	1.49769e-11	0.280138	0.828	0.571	5.00543e-07	0
PTGDS	1.77954e-11	0.547	0.25	0.069	5.94741e-07	0
NONO	1.79036e-11	0.438527	0.783	0.525	5.98355e-07	0
ADH5	1.84019e-11	0.365908	0.733	0.443	6.1501e-07	0
SEC11A	1.89804e-11	0.256581	0.756	0.496	6.34345e-07	0
FTL	1.90301e-11	0.50779	0.967	0.773	6.36003e-07	0
COL5A2	1.96536e-11	0.664609	0.556	0.273	6.56842e-07	0
TRIM28	1.99864e-11	0.335388	0.806	0.553	6.67964e-07	0
TMEM9	2.15739e-11	0.295016	0.494	0.236	7.21021e-07	0
TMEM64	2.20094e-11	0.261296	0.439	0.193	7.35577e-07	0
DCXR	2.34853e-11	0.287133	0.65	0.376	7.84903e-07	0
NDUFV1	2.4135e-11	0.330033	0.733	0.479	8.06616e-07	0
SRSF10	2.41414e-11	0.290568	0.517	0.254	8.06831e-07	0
KIAA0100	2.42372e-11	0.338379	0.656	0.383	8.10031e-07	0
TSPYL1	2.50574e-11	0.370994	0.75	0.521	8.37445e-07	0
SP3	2.57303e-11	0.341692	0.539	0.275	8.59931e-07	0
NDUFA12	2.57927e-11	0.399517	0.772	0.557	8.62017e-07	0
EFNA5	2.66567e-11	0.267184	0.383	0.147	8.90892e-07	0
RTRAF	2.69961e-11	0.339728	0.772	0.582	9.02237e-07	0
TSEN34	2.7889e-11	0.346655	0.544	0.296	9.32077e-07	0
TPD52	2.82776e-11	0.285054	0.594	0.323	9.45065e-07	0
G3BP1	2.8443e-11	0.364483	0.761	0.491	9.50593e-07	0
ACTL6A	2.93692e-11	0.30114	0.494	0.238	9.81548e-07	0
RNPS1	2.95334e-11	0.27588	0.761	0.502	9.87034e-07	0
NSMCE1	3.08342e-11	0.272869	0.417	0.177	1.03051e-06	0
RHEB	3.28731e-11	0.347215	0.717	0.443	1.09865e-06	0
HMGB2	3.29715e-11	0.406913	0.667	0.392	1.10194e-06	0
SSBP1	3.4089e-11	0.355412	0.828	0.615	1.13929e-06	0
CCNB1	3.49287e-11	0.375766	0.472	0.22	1.16735e-06	0
UBAC1	3.62071e-11	0.371513	0.667	0.445	1.21008e-06	0
METTL5	3.63134e-11	0.314222	0.667	0.401	1.21363e-06	0
C11orf58	3.77769e-11	0.294055	0.783	0.583	1.26254e-06	0
C19orf70	3.80867e-11	0.400041	0.794	0.606	1.2729e-06	0
IGFBP4	3.82571e-11	0.805458	0.622	0.34	1.27859e-06	0
MCTS1	3.90081e-11	0.312124	0.717	0.433	1.30369e-06	0
COX20	4.06163e-11	0.389064	0.678	0.438	1.35744e-06	0
SRSF7	4.13516e-11	0.392431	0.733	0.491	1.38201e-06	0
SARNP	4.13844e-11	0.252264	0.439	0.199	1.38311e-06	0
COMT	4.20599e-11	0.355157	0.839	0.644	1.40568e-06	0
AACS	4.37063e-11	0.298143	0.461	0.209	1.46071e-06	0
REX1BD	4.3934e-11	0.746299	0.606	0.365	1.46832e-06	0
THY1	4.49307e-11	0.840076	0.378	0.151	1.50163e-06	0
TRIB3	4.54064e-11	0.263565	0.35	0.131	1.51753e-06	0
SRD5A1	4.6768e-11	0.280146	0.556	0.307	1.56303e-06	0
MRPL13	4.70251e-11	0.25866	0.678	0.406	1.57163e-06	0
NDUFV2	4.8427e-11	0.304503	0.817	0.66	1.61848e-06	0
LSM1	4.87991e-11	0.327789	0.583	0.34	1.63092e-06	0
MRPS16	5.1794e-11	0.335785	0.733	0.486	1.73101e-06	0
CDC123	5.69738e-11	0.264892	0.622	0.356	1.90412e-06	0
EMP2	5.78518e-11	0.327531	0.822	0.635	1.93347e-06	0
NSG1	5.80466e-11	0.354052	0.811	0.613	1.93998e-06	0
UQCC2	6.06995e-11	0.348975	0.667	0.427	2.02864e-06	0
TTC37	6.18975e-11	0.275227	0.533	0.275	2.06868e-06	0
NORAD	6.34194e-11	0.437832	0.906	0.679	2.11954e-06	0
NDUFS4	6.37426e-11	0.375402	0.672	0.457	2.13034e-06	0
PRPF19	6.45486e-11	0.329829	0.589	0.328	2.15728e-06	0
UROD	6.74381e-11	0.372988	0.456	0.216	2.25385e-06	0
EIF4A1	6.9062e-11	0.340271	0.861	0.7	2.30812e-06	0
FAM84A	7.15931e-11	0.262576	0.767	0.58	2.39271e-06	0
HNRNPU	7.62301e-11	0.293146	0.889	0.635	2.54769e-06	0
DECR1	7.70467e-11	0.29976	0.644	0.401	2.57498e-06	0
LUM	7.81932e-11	0.849835	0.639	0.371	2.61329e-06	0
FMC1	7.86008e-11	0.250189	0.4	0.172	2.62692e-06	0
PYURF	8.00131e-11	0.412847	0.761	0.567	2.67412e-06	0
FAM57A	8.02092e-11	0.377488	0.667	0.395	2.68067e-06	0
GHITM	8.33282e-11	0.254775	0.822	0.629	2.78491e-06	0
STOML2	8.41577e-11	0.293976	0.739	0.496	2.81263e-06	0
ROMO1	8.80471e-11	0.345824	0.906	0.771	2.94262e-06	0
ECHS1	9.16742e-11	0.350174	0.717	0.473	3.06384e-06	0
LAGE3	9.17653e-11	0.366505	0.594	0.355	3.06689e-06	0
COX7A2L	9.21937e-11	0.331857	0.744	0.486	3.0812e-06	0
PRKDC	9.53238e-11	0.351998	0.672	0.42	3.18582e-06	0
AEBP2	9.55161e-11	0.328475	0.528	0.266	3.19224e-06	0
TUBA1B	9.68064e-11	0.484077	0.95	0.75	3.23537e-06	0
ITPA	9.95683e-11	0.307235	0.711	0.452	3.32767e-06	0
NOL7	1.03631e-10	0.317534	0.706	0.463	3.46345e-06	0
PLD1	1.10058e-10	0.371398	0.544	0.307	3.67823e-06	0
CDK1	1.12989e-10	0.261483	0.372	0.149	3.77619e-06	0
SMIM37	1.25114e-10	0.367932	0.672	0.422	4.18144e-06	0
LMNB2	1.25901e-10	0.306354	0.517	0.255	4.20774e-06	0
FASN	1.28089e-10	0.274154	0.706	0.479	4.28086e-06	0
UQCRC1	1.30686e-10	0.300983	0.828	0.594	4.36765e-06	0
PAM	1.35095e-10	0.275892	0.561	0.307	4.515e-06	0
PSMA7	1.36867e-10	0.392143	0.883	0.732	4.57422e-06	0
HSPA4	1.48665e-10	0.633564	0.667	0.42	4.96854e-06	0
TIMM23	1.49891e-10	0.303069	0.633	0.369	5.00951e-06	0
SSR4	1.50644e-10	0.418339	0.878	0.695	5.03466e-06	0
NIFK	1.55403e-10	0.262842	0.544	0.284	5.19374e-06	0
NT5DC2	1.59245e-10	0.362584	0.556	0.296	5.32213e-06	0
LRR1	1.60869e-10	0.266874	0.272	0.087	5.3764e-06	0
CHURC1	1.63882e-10	0.396649	0.711	0.511	5.4771e-06	0
KCTD1	1.6486e-10	0.287912	0.628	0.371	5.5098e-06	0
PSMB3	1.68069e-10	0.28533	0.911	0.718	5.61703e-06	0
PIK3R2	1.71084e-10	0.292211	0.489	0.243	5.7178e-06	0
RNF181	1.72872e-10	0.351931	0.794	0.55	5.77757e-06	0
CYC1	1.79863e-10	0.344686	0.756	0.551	6.01119e-06	0
BCCIP	1.87994e-10	0.327942	0.556	0.312	6.28293e-06	0
SPPL3	1.94366e-10	0.252538	0.8	0.601	6.4959e-06	0
NDUFAF2	1.99994e-10	0.305871	0.567	0.31	6.68399e-06	0
XRCC5	2.14567e-10	0.349359	0.761	0.523	7.17104e-06	0
FAM241A	2.30108e-10	0.2843	0.417	0.193	7.69045e-06	0
POLE4	2.36455e-10	0.254259	0.711	0.45	7.90258e-06	0
AHCY	2.60344e-10	0.268637	0.6	0.36	8.70095e-06	0
PFDN4	2.68712e-10	0.258593	0.606	0.358	8.98061e-06	0
PSMB5	2.7922e-10	0.416649	0.85	0.693	9.3318e-06	0
FKBP9	2.91904e-10	0.43018	0.783	0.493	9.75574e-06	0
TXN	2.92468e-10	0.543437	0.972	0.835	9.77458e-06	0
DNPH1	2.94971e-10	0.354445	0.683	0.44	9.85824e-06	0
SERPINF1	3.38533e-10	0.372286	0.478	0.223	1.13141e-05	0
SDHB	3.49091e-10	0.274242	0.678	0.447	1.1667e-05	0
PKP1	3.5985e-10	0.26176	0.978	0.876	1.20266e-05	0
CDK4	3.74092e-10	0.299674	0.572	0.309	1.25025e-05	0
NOC2L	3.79529e-10	0.25991	0.578	0.319	1.26842e-05	0
SEC61G	3.89261e-10	0.381826	0.917	0.761	1.30095e-05	0
HSD17B4	4.18138e-10	0.302448	0.594	0.332	1.39746e-05	0
CSE1L	4.19853e-10	0.324802	0.639	0.397	1.40319e-05	0
NOP56	4.22191e-10	0.368337	0.683	0.441	1.41101e-05	0
HMGN1	4.37656e-10	0.351714	0.856	0.688	1.46269e-05	0
COL5A3	4.37905e-10	0.383495	0.511	0.252	1.46352e-05	0
HSPB11	4.41088e-10	0.354122	0.567	0.314	1.47416e-05	0
QARS	4.53829e-10	0.331759	0.794	0.578	1.51674e-05	0
PRMT1	4.57354e-10	0.2655	0.656	0.418	1.52852e-05	0
RSL24D1	4.71843e-10	0.315781	0.711	0.48	1.57695e-05	0
RTL8A	4.73046e-10	0.334167	0.528	0.284	1.58097e-05	0
APOD	5.08542e-10	0.286632	0.289	0.098	1.6996e-05	0
MAN1A1	5.24862e-10	0.34906	0.478	0.238	1.75414e-05	0
DCN	5.39412e-10	0.892387	0.906	0.644	1.80277e-05	0
LSM2	5.6032e-10	0.301968	0.567	0.328	1.87265e-05	0
EML3	5.61052e-10	0.32548	0.494	0.259	1.87509e-05	0
THOC7	5.66456e-10	0.287155	0.706	0.493	1.89315e-05	0
ID3	5.85202e-10	0.310582	0.472	0.238	1.9558e-05	0
CXADR	5.91868e-10	0.44297	0.794	0.583	1.97808e-05	0
DDX49	6.08878e-10	0.306979	0.494	0.257	2.03493e-05	0
PSMA3	6.19383e-10	0.275492	0.783	0.571	2.07004e-05	0
TAF9	6.28592e-10	0.25461	0.694	0.454	2.10082e-05	0
FBLN2	6.50512e-10	0.84013	0.356	0.152	2.17407e-05	0
AK2	6.50682e-10	0.345882	0.772	0.574	2.17464e-05	0
C1orf123	6.57635e-10	0.659779	0.506	0.25	2.19788e-05	0
CTSK	6.59537e-10	0.609684	0.472	0.234	2.20424e-05	0
TMEM14B	6.73352e-10	0.291208	0.633	0.383	2.25041e-05	0
MTX1	6.74063e-10	0.365137	0.539	0.301	2.25279e-05	0
CCT6A	6.88454e-10	0.360206	0.806	0.631	2.30088e-05	0
TXN2	7.20565e-10	0.272412	0.617	0.395	2.4082e-05	0
COL6A3	8.06415e-10	0.826687	0.572	0.33	2.69512e-05	0
MRPL18	8.65927e-10	0.308976	0.628	0.394	2.89401e-05	0
CHCHD5	8.75004e-10	0.67773	0.661	0.42	2.92435e-05	0
SUCLG2	8.94051e-10	0.404762	0.589	0.333	2.98801e-05	0
PALLD	8.96371e-10	0.444491	0.767	0.562	2.99576e-05	0
RPA2	9.17036e-10	0.282381	0.5	0.261	3.06482e-05	0
CD52	9.53133e-10	0.305969	0.422	0.186	3.18547e-05	0
RUVBL2	9.83785e-10	0.296248	0.594	0.34	3.28791e-05	0
TMEM219	1.01728e-09	0.351809	0.7	0.496	3.39984e-05	0
NAA50	1.02757e-09	0.353073	0.75	0.539	3.43426e-05	0
NDFIP1	1.05209e-09	0.27669	0.633	0.367	3.51621e-05	0
NUDCD2	1.08118e-09	0.357921	0.578	0.335	3.61341e-05	0
TMEM183A	1.08877e-09	0.340417	0.539	0.294	3.63879e-05	0
C20orf27	1.10492e-09	0.322744	0.544	0.294	3.69275e-05	0
NMB	1.15363e-09	0.285354	0.483	0.254	3.85554e-05	0
VPS29	1.17114e-09	0.351227	0.789	0.613	3.91408e-05	0
IGKC	1.19085e-09	3.2708	0.772	0.521	3.97993e-05	0
RGS5	1.19203e-09	0.601226	0.294	0.112	3.98389e-05	0
SUMO3	1.20527e-09	0.461936	0.739	0.504	4.02814e-05	0
EIF3I	1.20725e-09	0.302715	0.839	0.644	4.03475e-05	0
MRPL24	1.27085e-09	0.255036	0.483	0.261	4.24732e-05	0
KITLG	1.29388e-09	0.309238	0.322	0.128	4.32429e-05	0
IDH3B	1.33753e-09	0.254618	0.572	0.348	4.47016e-05	0
FKBP3	1.37116e-09	0.360762	0.611	0.39	4.58255e-05	0
IMMT	1.50617e-09	0.264446	0.544	0.296	5.03377e-05	0
SFPQ	1.5116e-09	0.297848	0.839	0.637	5.05191e-05	0
AKR1A1	1.52072e-09	0.295291	0.667	0.441	5.08241e-05	0
EDF1	1.55261e-09	0.32919	0.894	0.736	5.18896e-05	0
SSRP1	1.55806e-09	0.308919	0.622	0.381	5.20721e-05	0
NDUFA6	1.63172e-09	0.306734	0.822	0.651	5.45337e-05	0
SNRNP200	1.73718e-09	0.319105	0.672	0.434	5.80582e-05	0
PCBD1	1.75038e-09	0.282107	0.511	0.266	5.84994e-05	0
DDX46	1.77963e-09	0.267551	0.5	0.248	5.9477e-05	0
SPTSSA	1.88958e-09	0.390306	0.728	0.523	6.31517e-05	0
ENAH	1.94827e-09	0.269464	0.806	0.635	6.51132e-05	0
VIM	2.05147e-09	0.692073	0.939	0.693	6.85623e-05	0
TFDP1	2.0773e-09	0.323804	0.7	0.434	6.94255e-05	0
ETF1	2.14997e-09	0.283353	0.733	0.551	7.18543e-05	0
RNF5	2.17724e-09	0.277107	0.5	0.262	7.27655e-05	0
C10orf99	2.19101e-09	0.48013	0.872	0.739	7.32259e-05	0
CLTA	2.19453e-09	0.342122	0.833	0.649	7.33433e-05	0
SNX2	2.25875e-09	0.253976	0.539	0.293	7.54896e-05	0
TSN	2.28531e-09	0.334275	0.661	0.42	7.63774e-05	0
SUPT16H	2.29213e-09	0.353744	0.6	0.333	7.66053e-05	0
AP1S1	2.37221e-09	0.319088	0.661	0.415	7.92815e-05	0
RBM8A	2.42891e-09	0.267074	0.861	0.677	8.11767e-05	0
CENPB	2.49725e-09	0.313979	0.689	0.42	8.34604e-05	0
TRIP6	2.51085e-09	0.367281	0.772	0.514	8.3915e-05	0
ILF3	2.54655e-09	0.309266	0.761	0.507	8.51084e-05	0
TP63	2.57292e-09	0.361094	0.85	0.608	8.59897e-05	0
PCLAF	2.65962e-09	0.252686	0.383	0.174	8.88872e-05	0
NDUFA8	2.67301e-09	0.29865	0.617	0.372	8.93348e-05	0
NDUFA10	2.76081e-09	0.332648	0.744	0.543	9.22692e-05	0
RCN1	2.86044e-09	0.341142	0.422	0.202	9.55988e-05	0
POMP	2.9936e-09	0.336037	0.883	0.69	0.000100049	0
PTBP1	3.01315e-09	0.365054	0.867	0.645	0.000100703	0
CLPP	3.08869e-09	0.259383	0.656	0.406	0.000103227	0
NAA10	3.23751e-09	0.320888	0.689	0.484	0.000108201	0
ST13	3.40874e-09	0.38859	0.839	0.605	0.000113923	0
LY6D	3.54961e-09	0.431722	0.994	0.867	0.000118632	0
SMAGP	3.68604e-09	0.286183	0.606	0.374	0.000123191	0
FAT2	3.76192e-09	0.26704	0.633	0.408	0.000125727	0
SRI	3.7937e-09	0.320116	0.7	0.449	0.000126789	0
TUBB	4.08402e-09	0.407809	0.933	0.729	0.000136492	0
HNRNPF	4.43863e-09	0.349504	0.85	0.615	0.000148343	0
ANP32A	4.80898e-09	0.334247	0.533	0.303	0.000160721	0
UQCRFS1	4.89353e-09	0.263642	0.822	0.621	0.000163547	0
CNPY2	5.02212e-09	0.308452	0.611	0.378	0.000167844	0
EBP	5.26971e-09	0.286556	0.617	0.369	0.000176119	0
EBPL	5.27694e-09	0.370304	0.717	0.463	0.000176361	0
PLEKHJ1	5.37511e-09	0.289538	0.578	0.339	0.000179642	0
LMO4	5.72556e-09	0.470679	0.689	0.468	0.000191354	0
TCF4	6.34835e-09	0.317848	0.567	0.316	0.000212168	0
KLF13	6.42547e-09	0.330851	0.7	0.436	0.000214746	0
CAPNS2	6.43057e-09	0.389964	0.678	0.516	0.000214916	0
NDUFS3	6.59491e-09	0.274034	0.644	0.42	0.000220408	0
HNRNPR	7.10988e-09	0.331093	0.717	0.496	0.000237619	0
NDUFAF3	7.12889e-09	0.273233	0.594	0.376	0.000238255	0
HP1BP3	7.17137e-09	0.330906	0.783	0.541	0.000239674	0
ACAT1	7.26987e-09	0.269222	0.539	0.316	0.000242966	0
FGFR2	7.70338e-09	0.281733	0.456	0.229	0.000257455	0
CHMP3	7.90511e-09	0.275836	0.75	0.488	0.000264197	0
CTDSP1	8.07277e-09	0.317588	0.55	0.305	0.0002698	0
VCAN	8.1082e-09	0.686016	0.35	0.16	0.000270984	0
FLOT2	8.34323e-09	0.254406	0.661	0.406	0.000278839	0
MORF4L1	8.73942e-09	0.386254	0.933	0.7	0.00029208	0
TMEM19	8.87958e-09	0.289434	0.578	0.342	0.000296764	0
DGUOK	8.95818e-09	0.29137	0.628	0.394	0.000299391	0
CALML3	9.07276e-09	0.482847	0.978	0.899	0.000303221	0
MT1E	9.16505e-09	0.286982	0.856	0.613	0.000306305	0
FBXW2	9.59522e-09	0.270903	0.539	0.317	0.000320682	0
COMMD7	9.63464e-09	0.253193	0.6	0.36	0.000321999	0
UBE2E3	1.01504e-08	0.250895	0.672	0.44	0.000339237	0
RBMX	1.06697e-08	0.275914	0.578	0.333	0.000356592	0
DDX18	1.13076e-08	0.294766	0.506	0.287	0.00037791	0
MARCKS	1.13583e-08	0.335781	0.9	0.656	0.000379605	0
POLR1D	1.13758e-08	0.306974	0.811	0.594	0.00038019	0
TRAP1	1.16478e-08	0.261056	0.556	0.314	0.00038928	0
CKB	1.23628e-08	0.262393	0.722	0.475	0.000413176	0
PPCS	1.33079e-08	0.328983	0.656	0.457	0.000444763	0
DYNLL2	1.33237e-08	0.335841	0.506	0.278	0.000445293	0
TSPAN14	1.3785e-08	0.283348	0.65	0.397	0.00046071	0
UBE2C	1.38055e-08	0.262311	0.45	0.227	0.000461393	0
SUMO2	1.41757e-08	0.328363	0.889	0.729	0.000473765	0
MRTO4	1.49468e-08	0.281038	0.556	0.324	0.000499536	0
2024-09-11	1.49784e-08	0.3128	0.233	0.078	0.000500593	0
SMIM19	1.53084e-08	0.250462	0.522	0.296	0.000511621	0
RNF126	1.53701e-08	0.301656	0.75	0.52	0.000513686	0
NET1	1.55628e-08	0.270414	0.6	0.349	0.000520123	0
NPM3	1.5821e-08	0.301404	0.378	0.183	0.000528754	0
RBX1	1.62828e-08	0.290222	0.883	0.72	0.000544189	0
PRCP	1.6519e-08	0.307223	0.583	0.344	0.00055208	0
PMPCA	1.67039e-08	0.290914	0.522	0.298	0.000558263	0
BAX	1.69332e-08	0.258475	0.5	0.268	0.000565924	0
PLGRKT	1.72096e-08	0.295341	0.522	0.298	0.000575163	0
AASDHPPT	1.73308e-08	0.327038	0.428	0.222	0.000579213	0
PYM1	1.74451e-08	0.284569	0.578	0.365	0.000583031	0
TXNDC12	1.78413e-08	0.284933	0.478	0.254	0.000596275	0
IRX2	1.79659e-08	0.288666	0.5	0.266	0.000600437	0
CTBP1	1.84805e-08	0.309839	0.639	0.401	0.000617636	0
NOTCH1	1.89174e-08	0.327586	0.528	0.298	0.000632238	0
CKMT1B	1.94525e-08	0.251271	0.65	0.433	0.000650121	0
IARS	1.98065e-08	0.289978	0.628	0.406	0.000661951	0
TAGLN2	2.05766e-08	0.378422	0.994	0.801	0.000687691	0
GNL3	2.14005e-08	0.270521	0.644	0.413	0.000715226	0
MOXD1	2.35944e-08	0.306645	0.356	0.161	0.000788548	0
EIF3M	2.39609e-08	0.360608	0.778	0.628	0.000800796	0
SUMF2	2.51024e-08	0.261117	0.533	0.282	0.000838946	0
MRPS25	2.53928e-08	0.304277	0.478	0.266	0.000848653	0
IGHG1	2.60659e-08	2.29242	0.272	0.11	0.000871147	0
USP14	2.60708e-08	0.282386	0.617	0.381	0.000871311	0
G3BP2	2.73078e-08	0.277263	0.611	0.369	0.000912654	0
YWHAE	2.83534e-08	0.333138	0.872	0.683	0.0009476	0
PSMB6	3.05824e-08	0.314597	0.828	0.676	0.00102209	0
LRPPRC	3.0893e-08	0.360513	0.589	0.365	0.00103247	0
IGHM	3.40664e-08	1.94468	0.3	0.124	0.00113853	0
PAPPA	3.41191e-08	0.319988	0.133	0.028	0.00114029	0
AP2M1	3.82585e-08	0.323331	0.872	0.649	0.00127864	0
GANAB	3.83888e-08	0.281904	0.628	0.394	0.00128299	0
DUS1L	3.89437e-08	0.331043	0.628	0.415	0.00130154	0
MRPL45	3.90003e-08	0.618216	0.428	0.211	0.00130343	0
RALY	3.91075e-08	0.26492	0.717	0.452	0.00130701	0
CKS2	3.99545e-08	0.362779	0.506	0.298	0.00133532	0
MFSD6	4.38457e-08	0.292101	0.622	0.379	0.00146537	0
TMPO	4.51363e-08	0.263197	0.483	0.252	0.0015085	0
ADI1	4.56014e-08	0.256344	0.589	0.388	0.00152405	0
PITHD1	4.60381e-08	0.274745	0.728	0.521	0.00153864	0
OGFRL1	4.8211e-08	0.287997	0.528	0.31	0.00161126	0
NFYC	4.86541e-08	0.26975	0.578	0.34	0.00162607	0
TRAPPC2L	4.88282e-08	0.322572	0.722	0.535	0.00163189	0
SLC35A4	4.90127e-08	0.478775	0.611	0.383	0.00163805	0
IMP3	5.31109e-08	0.272364	0.7	0.518	0.00177502	0
AP3S1	5.737e-08	0.252176	0.639	0.41	0.00191736	0
CCT5	5.74753e-08	0.294129	0.794	0.624	0.00192088	0
EIF3A	5.78174e-08	0.2592	0.833	0.635	0.00193232	0
TPSB2	5.80118e-08	0.729281	0.361	0.174	0.00193881	0
ELAVL1	5.9238e-08	0.27051	0.6	0.349	0.00197979	0
H2AFX	6.36002e-08	0.287437	0.472	0.254	0.00212558	0
LGALS1	6.38285e-08	0.3302	0.772	0.518	0.00213321	0
SPCS1	6.63521e-08	0.320626	0.728	0.551	0.00221755	0
NASP	6.65749e-08	0.252197	0.483	0.273	0.002225	0
IGFL2-AS1	6.80034e-08	0.266609	0.361	0.17	0.00227274	0
PITPNA	7.68619e-08	0.283887	0.678	0.477	0.0025688	0
SLC7A5	8.37661e-08	0.441736	0.772	0.544	0.00279955	0
ASAH1	8.38333e-08	0.301794	0.767	0.551	0.00280179	0
GAS1	8.77141e-08	0.322605	0.428	0.223	0.00293149	0
NOP58	9.49873e-08	0.306499	0.622	0.379	0.00317457	0
ELP2	9.59499e-08	0.273601	0.472	0.264	0.00320674	0
SRA1	9.60219e-08	0.255316	0.539	0.312	0.00320915	0
LAMTOR1	9.71813e-08	0.281695	0.822	0.642	0.0032479	0
PDCD6	9.96764e-08	0.300637	0.722	0.52	0.00333128	0
IGHG4	1.01004e-07	2.19679	0.539	0.326	0.00337565	0
TXNIP	1.03234e-07	0.320104	0.806	0.603	0.00345019	0
EIF2S2	1.04251e-07	0.271856	0.844	0.631	0.00348418	0
SNRNP25	1.06875e-07	0.25358	0.372	0.179	0.00357186	0
FKBP8	1.08017e-07	0.285716	0.728	0.528	0.00361004	0
SMIM7	1.08356e-07	0.254084	0.544	0.321	0.00362137	0
FSTL1	1.1915e-07	0.428116	0.522	0.31	0.00398211	0
PTPMT1	1.26052e-07	0.260606	0.572	0.369	0.0042128	0
HAT1	1.2849e-07	0.264932	0.533	0.323	0.00429428	0
MAZ	1.32718e-07	0.3032	0.561	0.332	0.00443556	0
SND1	1.44053e-07	0.288047	0.667	0.436	0.00481439	0
WDR18	1.45188e-07	0.254681	0.461	0.248	0.00485234	0
APEH	1.45782e-07	0.263217	0.661	0.445	0.00487216	0
TBL1XR1	1.45793e-07	0.292286	0.628	0.402	0.00487255	0
SLC39A6	1.51708e-07	0.273304	0.806	0.596	0.00507023	0
SF3B2	1.5449e-07	0.287347	0.767	0.532	0.00516321	0
NAP1L4	1.54828e-07	0.292302	0.7	0.475	0.00517452	0
EFEMP1	1.58429e-07	0.284863	0.572	0.371	0.00529487	0
CA12	1.66205e-07	0.26563	0.744	0.502	0.00555473	0
DEK	1.73907e-07	0.315139	0.611	0.399	0.00581215	0
KEAP1	1.79821e-07	0.27382	0.567	0.349	0.0060098	0
CACYBP	1.81129e-07	0.493937	0.694	0.484	0.00605351	0
SELENOM	1.84763e-07	0.316843	0.556	0.31	0.00617497	0
SDCCAG8	1.94124e-07	0.308759	0.517	0.317	0.00648783	0
DNAJB11	2.19184e-07	0.330117	0.611	0.388	0.00732536	0
OLFM2	2.22146e-07	0.277097	0.472	0.259	0.00742433	0
DDX5	2.41733e-07	0.29573	0.911	0.761	0.00807897	0
ASF1A	2.4607e-07	0.269648	0.394	0.204	0.00822392	0
NUDC	2.56933e-07	0.250737	0.628	0.415	0.00858695	0
MAGOH	2.58736e-07	0.265794	0.628	0.418	0.0086472	0
NARF	2.60192e-07	0.306355	0.494	0.28	0.00869589	0
ROGDI	2.60342e-07	0.625482	0.278	0.115	0.00870088	0
SNX3	2.65947e-07	0.317193	0.894	0.725	0.00888823	0
LGALS3BP	3.2762e-07	0.322525	0.689	0.465	0.0109494	0
NREP	4.38989e-07	0.256168	0.367	0.184	0.0146714	0
EAPP	4.56053e-07	0.31707	0.556	0.362	0.0152417	0
PRDX3	4.74247e-07	0.295759	0.544	0.335	0.0158498	0
DSP	4.78405e-07	0.253887	0.989	0.924	0.0159888	0
AHR	5.71709e-07	0.401068	0.561	0.358	0.0191071	0
ATP5F1D	6.04012e-07	0.258032	0.817	0.658	0.0201867	0
IFT20	6.39576e-07	0.256737	0.422	0.223	0.0213753	0
HTATIP2	7.45969e-07	0.250798	0.617	0.411	0.024931	0
LTBP3	7.63071e-07	0.270471	0.472	0.268	0.0255026	0
SNU13	7.90306e-07	0.331522	0.828	0.677	0.0264128	0
HTRA1	9.18656e-07	0.354415	0.622	0.39	0.0307024	0
IDH2	9.31781e-07	0.278377	0.8	0.599	0.0311411	0
BUD31	9.51071e-07	0.273422	0.711	0.532	0.0317857	0
VARS	9.58402e-07	0.262033	0.644	0.424	0.0320307	0
TRAPPC1	1.12604e-06	0.250577	0.711	0.557	0.0376334	0
SRSF6	1.15672e-06	0.261083	0.672	0.45	0.0386587	0
CCT3	1.31371e-06	0.286987	0.772	0.61	0.0439056	0
RAB3D	1.40751e-06	0.261491	0.711	0.537	0.0470403	0
AQP5	3.20882e-56	2.45406	0.863	0.193	1.07242e-51	1
HS3ST6	3.78037e-55	1.24991	0.696	0.09	1.26344e-50	1
SERPINA12	5.57477e-55	2.40753	0.922	0.251	1.86314e-50	1
PSAPL1	1.30828e-54	1.61346	0.647	0.072	4.37239e-50	1
PYDC1	1.48779e-54	2.01938	0.775	0.151	4.97233e-50	1
AADACL2	4.05669e-53	1.26298	0.765	0.142	1.35579e-48	1
DNASE1L2	4.24604e-53	1.48981	0.716	0.1	1.41907e-48	1
ARG1	1.86472e-52	2.40214	0.941	0.315	6.23209e-48	1
HRNR	4.75319e-52	3.14757	0.941	0.304	1.58856e-47	1
CALML5	2.34992e-51	2.33917	1	0.98	7.85366e-47	1
SLURP1	2.62971e-50	3.05184	1	0.841	8.78875e-46	1
HPGD	7.39895e-50	2.4909	0.882	0.235	2.4728e-45	1
C5orf46	1.21066e-48	2.57563	0.843	0.238	4.04615e-44	1
FLG	1.46557e-48	3.30592	1	0.852	4.89807e-44	1
CASP14	1.76377e-48	2.49636	0.99	0.751	5.89471e-44	1
LOR	7.1014e-48	3.24465	1	0.843	2.37336e-43	1
FLG2	1.00068e-47	2.62222	1	0.621	3.34438e-43	1
HAL	1.13412e-47	2.30304	0.912	0.321	3.79033e-43	1
GLRX	1.98688e-47	1.80203	0.863	0.252	6.64035e-43	1
CST6	1.19553e-46	2.36916	0.971	0.506	3.9956e-42	1
SPTSSB	1.39501e-46	1.41587	0.765	0.182	4.66227e-42	1
SLC46A2	3.74505e-46	1.13159	0.471	0.034	1.25163e-41	1
CD36	1.3003e-44	2.25988	0.882	0.361	4.34574e-40	1
CSNK2A2	1.45326e-44	2.51456	0.931	0.47	4.85695e-40	1
CA6	1.78248e-43	0.964866	0.363	0.012	5.95724e-39	1
2024-03-03	2.09499e-43	1.28813	0.608	0.089	7.00166e-39	1
SERPINB3	4.84016e-43	2.10062	0.961	0.808	1.61763e-38	1
IDE	5.66433e-43	2.48494	0.912	0.431	1.89307e-38	1
DMKN	1.50011e-42	0.996042	1	0.978	5.01351e-38	1
ARL5A	3.39411e-42	1.88801	0.931	0.52	1.13435e-37	1
AZGP1	4.44967e-42	2.64458	0.863	0.266	1.48713e-37	1
CARD18	4.94031e-42	2.3695	0.794	0.252	1.6511e-37	1
LYPD2	8.61897e-42	1.16062	0.451	0.037	2.88055e-37	1
UPK1A	1.26777e-41	0.545766	0.471	0.042	4.237e-37	1
GLTP	3.08354e-40	1.44399	0.971	0.846	1.03055e-35	1
ANXA9	3.24614e-40	1.35222	0.578	0.087	1.08489e-35	1
HOPX	9.89747e-40	2.24643	0.99	0.86	3.30783e-35	1
KRT23	1.25572e-39	1.8315	0.863	0.294	4.19675e-35	1
HYAL4	1.85607e-39	0.478351	0.353	0.016	6.20317e-35	1
ELMOD1	1.90454e-39	1.39003	0.529	0.069	6.36516e-35	1
LCE2D	8.72814e-39	2.57363	0.686	0.137	2.91703e-34	1
IL37	2.28024e-38	1.86413	0.471	0.048	7.62077e-34	1
ACER1	4.9119e-38	1.10851	0.667	0.15	1.6416e-33	1
KRTDAP	6.23612e-38	1.5113	1	0.981	2.08418e-33	1
NCCRP1	1.15454e-37	1.69113	0.971	0.774	3.8586e-33	1
ELOVL7	1.18715e-37	1.83961	0.882	0.363	3.96756e-33	1
KLK7	1.23967e-37	1.72772	0.971	0.81	4.14311e-33	1
BNIP3L	1.39668e-37	2.08481	0.941	0.581	4.66784e-33	1
EPS8L1	1.72396e-37	1.41231	0.912	0.364	5.76165e-33	1
LY6G6C	6.53224e-37	1.89507	0.941	0.579	2.18314e-32	1
AADAC	6.6431e-37	0.890028	0.461	0.053	2.22019e-32	1
KRT78	7.24989e-37	1.77247	0.863	0.397	2.42299e-32	1
SLC15A1	7.43529e-37	1.16931	0.647	0.131	2.48495e-32	1
UNC5B-AS1	1.0984e-36	1.2431	0.461	0.053	3.67095e-32	1
ASPRV1	1.35856e-36	2.73058	0.98	0.738	4.54045e-32	1
ELOVL4	1.84299e-36	1.58431	0.863	0.389	6.15944e-32	1
KRT1	4.12875e-36	1.64445	1	0.991	1.37987e-31	1
LCE1C	7.41133e-36	2.82466	0.765	0.22	2.47694e-31	1
MFAP3L	8.27613e-36	1.17277	0.539	0.087	2.76597e-31	1
CSTA	8.95012e-36	1.21528	1	0.974	2.99122e-31	1
KPRP	2.93892e-35	1.53778	0.833	0.285	9.82216e-31	1
PSORS1C2	5.17513e-35	2.00455	0.608	0.117	1.72958e-30	1
FA2H	6.82792e-35	0.438204	0.314	0.014	2.28196e-30	1
AC113410.2	1.02037e-34	0.85808	0.324	0.017	3.41017e-30	1
KRT10	1.54343e-34	1.71311	1	0.984	5.15828e-30	1
PLA2G4D	1.55312e-34	1.33879	0.765	0.249	5.19069e-30	1
RORA	1.6328e-34	1.4665	0.902	0.431	5.45697e-30	1
SERPINB7	5.6551e-34	2.03569	0.892	0.519	1.88999e-29	1
SBSN	6.21726e-34	1.43629	0.99	0.947	2.07787e-29	1
KRT79	1.77855e-33	1.3878	0.608	0.137	5.9441e-29	1
AL357060.1	7.5445e-33	0.904926	0.48	0.07	2.52145e-28	1
ASAP3	9.44844e-33	0.991087	0.627	0.153	3.15776e-28	1
SDR16C5	5.7134e-32	1.74083	0.882	0.607	1.90948e-27	1
TGM3	1.07116e-31	1.42767	0.784	0.291	3.57994e-27	1
FAM25A	1.16308e-31	2.07739	0.971	0.777	3.88713e-27	1
SRPK1	1.17842e-31	1.5024	0.755	0.296	3.93841e-27	1
KRT9	1.17951e-31	2.31689	0.892	0.57	3.94203e-27	1
LCE6A	2.05615e-31	1.74669	0.402	0.045	6.87187e-27	1
GLB1L3	4.72094e-31	0.52818	0.255	0.008	1.57778e-26	1
CHMP4C	6.78167e-31	1.4047	0.775	0.288	2.2665e-26	1
TMEM45A	2.11708e-30	1.30086	0.951	0.872	7.07549e-26	1
EIF4H	3.33726e-30	1.49134	0.971	0.798	1.11535e-25	1
CDSN	3.3757e-30	2.19227	0.99	0.793	1.12819e-25	1
SPNS2	3.70084e-30	1.43594	0.539	0.111	1.23686e-25	1
SNTB1	1.08091e-29	0.728298	0.392	0.045	3.61252e-25	1
AC011473.4	1.63565e-29	1.3245	0.529	0.106	5.4665e-25	1
SCEL	1.75246e-29	1.50196	0.804	0.436	5.8569e-25	1
OTUB2	2.50908e-29	1.10287	0.618	0.17	8.38559e-25	1
ALOX12B	3.03159e-29	1.42713	0.824	0.388	1.01319e-24	1
DEGS2	6.97441e-29	1.53111	0.804	0.447	2.33092e-24	1
CREG1	7.50262e-29	1.08954	0.873	0.66	2.50745e-24	1
SLC37A2	9.51308e-29	0.902673	0.451	0.072	3.17937e-24	1
SPINK9	1.0856e-28	1.06411	0.373	0.044	3.62817e-24	1
TPRG1	1.22688e-28	0.924136	0.588	0.143	4.10036e-24	1
MAP1LC3A	1.542e-28	1.55642	0.814	0.38	5.15353e-24	1
DHCR7	1.55957e-28	1.11046	0.676	0.234	5.21225e-24	1
LCE1B	2.46368e-28	2.84227	0.775	0.316	8.23386e-24	1
GGCT	3.06316e-28	1.78767	0.863	0.601	1.02374e-23	1
CYSRT1	3.07936e-28	1.32104	0.882	0.547	1.02915e-23	1
PLBD1	4.53572e-28	1.8461	0.853	0.502	1.51588e-23	1
SPINK5	4.56332e-28	1.43798	0.951	0.769	1.52511e-23	1
IGFL3	1.01626e-27	1.06675	0.588	0.16	3.39643e-23	1
NEAT1	1.13683e-27	1.3524	0.951	0.827	3.7994e-23	1
ZNF662	1.71359e-27	0.68679	0.461	0.083	5.72699e-23	1
CENPM	2.83398e-27	0.657655	0.5	0.103	9.47144e-23	1
PPL	3.32075e-27	1.1934	0.941	0.724	1.10983e-22	1
LCE2B	3.48718e-27	2.3838	0.794	0.318	1.16545e-22	1
H2AFJ	3.57695e-27	1.55289	0.922	0.79	1.19545e-22	1
TM7SF2	3.87505e-27	1.56689	0.794	0.427	1.29508e-22	1
KRT2	5.69036e-27	1.89983	0.98	0.907	1.90178e-22	1
SH3BGRL2	6.74372e-27	0.255218	0.431	0.069	2.25382e-22	1
CNFN	6.9934e-27	1.39261	0.98	0.928	2.33726e-22	1
KLK8	2.85436e-26	1.43549	0.882	0.712	9.53955e-22	1
GAN	4.47069e-26	1.39023	0.716	0.299	1.49415e-21	1
WFDC5	4.69475e-26	0.66973	0.814	0.364	1.56903e-21	1
ATP2C2	5.14772e-26	0.659021	0.49	0.103	1.72042e-21	1
LCE1A	6.2065e-26	1.02232	0.235	0.011	2.07428e-21	1
IL36RN	7.94012e-26	1.34103	0.882	0.657	2.65367e-21	1
YOD1	2.05657e-25	1.8631	0.765	0.322	6.87325e-21	1
EGLN3	2.25299e-25	1.06047	0.735	0.271	7.52973e-21	1
RHBG	2.47896e-25	0.463105	0.324	0.034	8.28492e-21	1
CPE	6.02655e-25	1.28979	0.735	0.282	2.01413e-20	1
NKPD1	6.84457e-25	0.504417	0.49	0.104	2.28752e-20	1
ATG9B	8.68126e-25	1.11821	0.343	0.042	2.90137e-20	1
ATP6V1C2	1.00303e-24	1.04281	0.529	0.137	3.35223e-20	1
ZBTB7C	1.01333e-24	0.948176	0.667	0.245	3.38666e-20	1
GGH	1.31955e-24	1.49689	0.804	0.551	4.41006e-20	1
FGF22	1.35696e-24	0.91042	0.275	0.022	4.5351e-20	1
ABHD12B	1.38958e-24	0.403964	0.225	0.011	4.64413e-20	1
EGR3	1.56437e-24	0.71289	0.5	0.112	5.22827e-20	1
KLK11	1.72263e-24	1.27832	0.853	0.639	5.75721e-20	1
LMO7	5.58053e-24	0.941864	0.686	0.255	1.86507e-19	1
LINC00592	6.37956e-24	0.590259	0.392	0.065	2.13211e-19	1
FAIM2	6.53792e-24	0.448773	0.284	0.026	2.18504e-19	1
JMY	8.08917e-24	1.32488	0.618	0.202	2.70348e-19	1
METRNL	1.02147e-23	1.09705	0.912	0.696	3.41384e-19	1
LCE2C	1.05283e-23	2.60582	0.667	0.232	3.51865e-19	1
POF1B	1.35385e-23	1.59021	0.794	0.422	4.52469e-19	1
FAM162A	1.36275e-23	1.16477	0.873	0.801	4.55445e-19	1
SCNN1B	1.42659e-23	0.573962	0.608	0.204	4.76782e-19	1
FETUB	1.53099e-23	0.355625	0.353	0.048	5.11673e-19	1
GSDMA	1.54578e-23	1.77564	0.745	0.318	5.16615e-19	1
WDR26	1.59023e-23	1.38443	0.843	0.533	5.31472e-19	1
ABHD5	2.56231e-23	1.1565	0.696	0.298	8.56351e-19	1
AVPI1	2.68071e-23	1.02646	0.657	0.24	8.95921e-19	1
DGAT2	2.69481e-23	1.28476	0.745	0.402	9.00633e-19	1
ABCA12	2.73543e-23	1.39218	0.794	0.449	9.14209e-19	1
LCE2A	2.80791e-23	2.33108	0.686	0.26	9.38433e-19	1
BNIP3	3.10676e-23	1.40025	0.804	0.502	1.03831e-18	1
CTSH	6.64549e-23	1.5795	0.725	0.313	2.22099e-18	1
SPINK7	9.13173e-23	1.6025	0.716	0.287	3.05192e-18	1
EYA2	1.38651e-22	1.20321	0.373	0.062	4.63386e-18	1
ALDOC	1.51073e-22	0.786619	0.539	0.151	5.049e-18	1
PNLIPRP3	2.9721e-22	1.03659	0.51	0.142	9.93305e-18	1
UNC93A	3.61542e-22	0.663269	0.461	0.104	1.20831e-17	1
DHCR24	6.32393e-22	1.04899	0.853	0.684	2.11352e-17	1
AL034376.2	6.85553e-22	0.914022	0.52	0.143	2.29119e-17	1
CPM	1.52676e-21	0.745255	0.5	0.132	5.10258e-17	1
ELOVL1	1.99462e-21	1.26578	0.853	0.699	6.66623e-17	1
ULK1	2.01948e-21	1.3709	0.745	0.34	6.74932e-17	1
HMOX1	3.25108e-21	1.57187	0.598	0.202	1.08654e-16	1
CIDEA	3.55077e-21	0.66207	0.49	0.139	1.1867e-16	1
INSIG2	4.17378e-21	0.681777	0.48	0.128	1.39492e-16	1
CSNK2B	4.56972e-21	1.09348	0.843	0.731	1.52725e-16	1
CHRNA9	6.15808e-21	0.303426	0.147	0.002	2.05809e-16	1
SMPD3	1.13428e-20	0.826345	0.441	0.098	3.79086e-16	1
CAT	1.34327e-20	1.36363	0.755	0.464	4.48934e-16	1
GABARAPL2	1.36751e-20	1.44533	0.843	0.578	4.57034e-16	1
SORT1	1.49261e-20	1.12649	0.735	0.431	4.98844e-16	1
CITED2	1.6965e-20	1.48309	0.716	0.327	5.66988e-16	1
BICDL2	1.82374e-20	1.03292	0.725	0.347	6.09512e-16	1
HEBP2	2.24473e-20	1.01305	0.892	0.704	7.50211e-16	1
PDZD2	3.33313e-20	0.752761	0.461	0.114	1.11397e-15	1
AQP9	3.4361e-20	0.507751	0.284	0.036	1.14838e-15	1
RMND5A	4.02677e-20	0.967412	0.745	0.371	1.34579e-15	1
MPZL3	4.09392e-20	0.94359	0.637	0.268	1.36823e-15	1
TGM5	5.52505e-20	0.729142	0.569	0.187	1.84653e-15	1
MUC15	6.05544e-20	0.694267	0.598	0.217	2.02379e-15	1
KRT80	7.21297e-20	1.22473	0.853	0.548	2.41065e-15	1
KLK5	7.29416e-20	1.51504	0.961	0.816	2.43778e-15	1
ACPP	7.96067e-20	0.567885	0.51	0.156	2.66054e-15	1
HK2	9.11801e-20	0.995231	0.775	0.447	3.04733e-15	1
PIM1	1.17895e-19	1.17694	0.843	0.583	3.94017e-15	1
LCE3D	1.2033e-19	2.26074	0.922	0.732	4.02154e-15	1
PTGER3	1.48697e-19	0.5057	0.402	0.086	4.96959e-15	1
DSC1	1.70334e-19	0.957373	0.912	0.701	5.69272e-15	1
SULT2B1	1.76602e-19	1.16864	0.814	0.636	5.90223e-15	1
XG	2.08995e-19	1.27679	0.725	0.379	6.98481e-15	1
CRCT1	2.11547e-19	2.23883	0.902	0.643	7.07011e-15	1
AC006262.2	3.22958e-19	0.550113	0.48	0.136	1.07936e-14	1
FBXO45	3.53092e-19	1.12632	0.725	0.38	1.18007e-14	1
FCHO1	4.22573e-19	0.410849	0.294	0.042	1.41228e-14	1
LCE1E	5.02772e-19	2.04618	0.402	0.09	1.68031e-14	1
BLMH	6.5683e-19	1.25036	0.637	0.293	2.19519e-14	1
MSMO1	7.10627e-19	1.05649	0.804	0.586	2.37499e-14	1
ALOXE3	7.9413e-19	0.855925	0.676	0.29	2.65406e-14	1
SERPINB13	1.01884e-18	0.880394	0.882	0.701	3.40505e-14	1
HSDL2	1.132e-18	1.10703	0.647	0.321	3.78324e-14	1
ABLIM1	1.18524e-18	0.802694	0.833	0.653	3.96119e-14	1
ARG2	1.27049e-18	0.760784	0.392	0.092	4.24611e-14	1
VAT1	1.2728e-18	0.83676	0.784	0.528	4.25381e-14	1
CTNNBIP1	1.86363e-18	1.06002	0.902	0.752	6.22844e-14	1
SCNN1A	1.88938e-18	0.815457	0.667	0.299	6.31451e-14	1
BCKDK	1.92829e-18	0.923344	0.765	0.48	6.44453e-14	1
RNF227	3.50143e-18	1.14811	0.48	0.146	1.17021e-13	1
APOB	3.83398e-18	0.342249	0.137	0.003	1.28135e-13	1
MIR210HG	3.91867e-18	0.906987	0.588	0.254	1.30966e-13	1
SPTY2D1OS	4.6115e-18	0.593464	0.402	0.101	1.54121e-13	1
GDE1	4.63435e-18	0.958537	0.755	0.424	1.54885e-13	1
EPN3	5.429e-18	1.2512	0.598	0.232	1.81443e-13	1
TMEM86A	5.59782e-18	0.486697	0.559	0.202	1.87085e-13	1
LINC00302	6.31447e-18	1.24601	0.324	0.059	2.11036e-13	1
MCUR1	6.46988e-18	0.872081	0.686	0.371	2.1623e-13	1
KCTD11	9.13794e-18	0.625679	0.598	0.232	3.05399e-13	1
AC004816.1	9.79385e-18	0.832602	0.412	0.104	3.2732e-13	1
CLN8	1.02741e-17	0.891348	0.559	0.206	3.4337e-13	1
MRPS30-DT	1.20912e-17	0.389766	0.216	0.022	4.04099e-13	1
SPTLC3	1.25848e-17	0.848559	0.667	0.349	4.20598e-13	1
PAQR7	1.51908e-17	0.697431	0.48	0.151	5.07693e-13	1
C4orf3	1.60271e-17	0.773864	0.873	0.819	5.35641e-13	1
CLIC3	1.76274e-17	1.27369	0.804	0.67	5.89126e-13	1
APPL2	2.02381e-17	1.04494	0.598	0.248	6.76379e-13	1
CCDC9B	2.05073e-17	0.378118	0.333	0.064	6.85374e-13	1
CYP4F22	2.12389e-17	1.19172	0.735	0.494	7.09826e-13	1
ARHGEF10L	2.15252e-17	0.715054	0.598	0.249	7.19395e-13	1
SDR9C7	2.6292e-17	0.867048	0.706	0.388	8.78704e-13	1
PRDM1	3.17999e-17	1.14116	0.627	0.276	1.06279e-12	1
PRSS8	3.88792e-17	0.895206	0.833	0.545	1.29938e-12	1
PRDX2	3.93474e-17	1.1368	0.853	0.718	1.31503e-12	1
AC082651.3	4.00319e-17	0.36103	0.314	0.059	1.33791e-12	1
CPEB4	4.27973e-17	0.654375	0.618	0.263	1.43033e-12	1
PRDX6	4.39206e-17	0.749213	0.882	0.765	1.46787e-12	1
AC008592.5	5.43567e-17	0.319633	0.147	0.006	1.81666e-12	1
KLF4	5.52151e-17	0.799008	0.843	0.741	1.84534e-12	1
LYNX1-SLURP2	6.68338e-17	0.65972	0.598	0.246	2.23365e-12	1
ITGAM	7.08912e-17	0.385259	0.176	0.012	2.36925e-12	1
RNF39	7.61551e-17	0.883287	0.412	0.107	2.54518e-12	1
GPX3	7.83885e-17	0.976306	0.745	0.469	2.61982e-12	1
VSIG10L	8.22298e-17	0.989728	0.608	0.277	2.7482e-12	1
HSPA2	9.39509e-17	1.33178	0.657	0.321	3.13993e-12	1
HSD11B1	1.13175e-16	0.292766	0.127	0.003	3.78242e-12	1
GADD45G	1.41569e-16	0.497988	0.48	0.159	4.73136e-12	1
MYO6	2.20284e-16	1.08797	0.716	0.369	7.3621e-12	1
CTSA	2.55125e-16	0.993645	0.902	0.704	8.52652e-12	1
NFE2L3	2.77969e-16	0.272046	0.51	0.168	9.28999e-12	1
C6orf15	2.85701e-16	0.913578	0.265	0.042	9.5484e-12	1
BPIFC	3.55302e-16	0.516424	0.539	0.202	1.18745e-11	1
ATP7A	4.32742e-16	0.667792	0.51	0.181	1.44627e-11	1
DYNLL1	5.38631e-16	0.551178	0.99	0.936	1.80016e-11	1
TMEM45B	5.64151e-16	0.711422	0.765	0.421	1.88545e-11	1
FAM43A	6.00793e-16	0.953051	0.657	0.312	2.00791e-11	1
ABHD12	6.71432e-16	1.13246	0.559	0.245	2.24399e-11	1
PHETA1	8.35379e-16	0.659734	0.363	0.09	2.79192e-11	1
PPDPF	8.76404e-16	0.753335	0.863	0.783	2.92903e-11	1
LRP10	8.90132e-16	0.81928	0.892	0.69	2.97491e-11	1
IFITM10	9.04954e-16	0.822693	0.422	0.117	3.02445e-11	1
ACP7	1.04447e-15	0.916648	0.382	0.097	3.49072e-11	1
EREG	1.2397e-15	0.834877	0.5	0.171	4.14322e-11	1
ESYT3	2.0673e-15	0.840963	0.333	0.078	6.90914e-11	1
GDPD3	3.06259e-15	0.517521	0.657	0.312	1.02355e-10	1
TMEM170B	3.18437e-15	0.255159	0.225	0.031	1.06425e-10	1
TINCR	4.63857e-15	0.997553	0.833	0.607	1.55026e-10	1
SLC31A1	5.52307e-15	0.647063	0.608	0.288	1.84587e-10	1
WDR72	5.96352e-15	0.250407	0.235	0.036	1.99307e-10	1
AC009171.2	6.9465e-15	0.377655	0.186	0.02	2.32159e-10	1
EPHX3	7.389e-15	0.890221	0.735	0.523	2.46948e-10	1
OVOL1-AS1	7.90036e-15	0.367216	0.206	0.026	2.64038e-10	1
LIPE-AS1	8.255e-15	0.763133	0.686	0.379	2.7589e-10	1
GAS7	1.07834e-14	0.712365	0.578	0.234	3.60393e-10	1
MTHFD2L	1.19244e-14	0.840174	0.549	0.237	3.98526e-10	1
MBOAT2	1.30753e-14	0.774545	0.725	0.481	4.36988e-10	1
NEB	1.38814e-14	0.262459	0.157	0.012	4.63931e-10	1
RDH13	1.68928e-14	0.681248	0.52	0.202	5.64576e-10	1
ZBTB43	1.72876e-14	0.601391	0.529	0.213	5.77769e-10	1
TRIM62	1.84664e-14	0.589197	0.373	0.103	6.17167e-10	1
LCE3E	2.10786e-14	2.01195	0.716	0.408	7.04466e-10	1
GFOD2	2.25667e-14	1.08686	0.588	0.268	7.54201e-10	1
FRMPD1	2.36398e-14	0.376155	0.127	0.006	7.90065e-10	1
KIAA0513	2.40518e-14	0.684616	0.5	0.198	8.03834e-10	1
CARS	2.40634e-14	0.637029	0.676	0.383	8.04222e-10	1
KLK13	2.42958e-14	0.586846	0.382	0.106	8.11989e-10	1
FAM181B	2.66212e-14	0.291748	0.127	0.006	8.89707e-10	1
LCE1F	2.82476e-14	0.580668	0.127	0.006	9.44064e-10	1
SMIM5	2.95319e-14	0.748181	0.657	0.36	9.86985e-10	1
ALOX12	3.35902e-14	0.285204	0.196	0.025	1.12262e-09	1
ACSL1	3.85011e-14	0.822161	0.755	0.562	1.28674e-09	1
SLC16A10	4.01161e-14	0.332254	0.343	0.086	1.34072e-09	1
CLTB	4.18428e-14	0.692048	0.951	0.824	1.39843e-09	1
LYPLA1	4.4003e-14	1.10634	0.853	0.67	1.47062e-09	1
DSG1	4.46964e-14	0.679768	0.941	0.872	1.4938e-09	1
SLURP2	4.79216e-14	0.32653	0.314	0.073	1.60159e-09	1
LNX1	5.21908e-14	0.671038	0.196	0.025	1.74427e-09	1
LINC02560	6.61613e-14	0.762015	0.559	0.235	2.21118e-09	1
TNFSF9	7.57152e-14	0.334966	0.284	0.059	2.53048e-09	1
TTC39B	9.77094e-14	0.769413	0.588	0.304	3.26554e-09	1
C1orf68	1.01339e-13	1.70444	0.627	0.279	3.38686e-09	1
TUFT1	1.11383e-13	1.16575	0.745	0.497	3.72252e-09	1
LINC01554	1.26068e-13	0.357191	0.206	0.03	4.21332e-09	1
HEPH	1.43995e-13	0.34044	0.363	0.1	4.81245e-09	1
TNFRSF13C	1.82361e-13	0.265919	0.245	0.044	6.09469e-09	1
KRT77	1.84563e-13	0.89226	0.412	0.126	6.16829e-09	1
SCD	2.20206e-13	0.888195	0.725	0.547	7.35951e-09	1
AL355607.2	2.42108e-13	0.373894	0.127	0.008	8.09148e-09	1
ANO8	2.64052e-13	0.271482	0.275	0.059	8.82488e-09	1
SPSB3	3.76209e-13	0.915324	0.559	0.257	1.25733e-08	1
BNIPL	4.38119e-13	1.02982	0.696	0.522	1.46424e-08	1
EIF6	4.59292e-13	0.649415	0.853	0.788	1.535e-08	1
ABCG1	5.37074e-13	0.607849	0.529	0.229	1.79495e-08	1
THEM5	5.80809e-13	0.662793	0.51	0.226	1.94112e-08	1
RASAL1	6.90654e-13	0.331028	0.422	0.145	2.30824e-08	1
PCDH1	6.99308e-13	0.860463	0.549	0.259	2.33716e-08	1
MCC	7.32204e-13	0.668294	0.471	0.188	2.4471e-08	1
RANBP9	8.53558e-13	0.925453	0.676	0.411	2.85268e-08	1
DDHD1	9.17143e-13	0.448632	0.304	0.073	3.06518e-08	1
ATP13A4	9.17402e-13	0.458491	0.206	0.033	3.06605e-08	1
TCHH	1.0789e-12	0.367242	0.353	0.103	3.60581e-08	1
AC015912.3	1.19863e-12	0.463774	0.333	0.09	4.00594e-08	1
IL22RA1	1.31579e-12	0.751621	0.5	0.217	4.3975e-08	1
SLC23A1	1.32968e-12	0.278501	0.275	0.062	4.44392e-08	1
PNPLA3	1.5362e-12	0.35089	0.147	0.014	5.13413e-08	1
MKNK2	1.65016e-12	1.01051	0.755	0.534	5.51501e-08	1
MAP1LC3B	1.76458e-12	1.10223	0.824	0.651	5.89741e-08	1
PLCXD1	2.3574e-12	1.10798	0.569	0.266	7.87867e-08	1
GBA	3.29747e-12	1.05922	0.618	0.324	1.10205e-07	1
SSFA2	3.36641e-12	0.81194	0.794	0.601	1.12509e-07	1
KLHL18	3.5107e-12	0.83444	0.618	0.321	1.17331e-07	1
NIPAL2	3.59176e-12	0.770245	0.598	0.347	1.2004e-07	1
CLDN4	3.96628e-12	0.792833	0.735	0.495	1.32557e-07	1
YPEL3	4.12502e-12	0.667085	0.667	0.389	1.37862e-07	1
FCHSD1	4.18489e-12	1.00148	0.431	0.156	1.39863e-07	1
HIP1R	4.62853e-12	0.967663	0.627	0.335	1.5469e-07	1
GJB4	4.81012e-12	0.361451	0.245	0.051	1.60759e-07	1
CNNM4	5.08876e-12	0.586742	0.363	0.115	1.70072e-07	1
IFRD1	5.12128e-12	0.457916	0.402	0.14	1.71158e-07	1
HMGCR	5.5679e-12	0.693659	0.765	0.595	1.86085e-07	1
TMPRSS13	5.69598e-12	0.925978	0.627	0.357	1.90365e-07	1
RPTN	5.90531e-12	1.57172	0.471	0.195	1.97361e-07	1
ACP5	5.91054e-12	0.540243	0.618	0.321	1.97536e-07	1
CDC34	6.70256e-12	0.962441	0.569	0.315	2.24006e-07	1
ESRP1	7.3292e-12	0.684399	0.804	0.617	2.44949e-07	1
NMNAT3	7.36058e-12	0.253336	0.265	0.061	2.45998e-07	1
ZRANB1	8.26163e-12	0.819798	0.549	0.26	2.76112e-07	1
ATP1B1	9.48314e-12	0.912093	0.657	0.399	3.16936e-07	1
PLA2G2F	9.6242e-12	0.570342	0.353	0.111	3.2165e-07	1
SLC30A1	1.04741e-11	0.808482	0.706	0.433	3.50055e-07	1
MXI1	1.05883e-11	0.645393	0.627	0.364	3.53872e-07	1
SH3GLB2	1.07032e-11	0.870521	0.696	0.477	3.5771e-07	1
LCE5A	1.21815e-11	0.496657	0.127	0.011	4.07118e-07	1
SOX7	1.23429e-11	0.528787	0.559	0.285	4.12512e-07	1
BICD2	1.26361e-11	0.464079	0.814	0.664	4.22312e-07	1
SERPINB8	1.31586e-11	0.621345	0.735	0.526	4.39773e-07	1
C2orf54	1.40652e-11	0.611718	0.451	0.185	4.70071e-07	1
ACAD9	1.42679e-11	0.630445	0.608	0.346	4.76847e-07	1
CERS3	1.54482e-11	0.770528	0.775	0.65	5.16295e-07	1
QPCT	1.58654e-11	0.974063	0.422	0.164	5.30236e-07	1
VASN	1.74003e-11	0.442545	0.402	0.142	5.81535e-07	1
WIPI2	1.86494e-11	0.719022	0.765	0.509	6.2328e-07	1
SPIRE1	1.88817e-11	0.64929	0.333	0.106	6.31044e-07	1
UGCG	1.89913e-11	0.640992	0.706	0.466	6.34709e-07	1
2024-09-08	2.07424e-11	0.699838	0.686	0.452	6.93232e-07	1
RORC	2.36178e-11	0.261336	0.196	0.034	7.89331e-07	1
GRAMD1C	2.54428e-11	0.522233	0.235	0.05	8.50325e-07	1
SVIP	2.69777e-11	0.410803	0.392	0.14	9.01622e-07	1
CCSAP	2.80035e-11	0.5061	0.343	0.106	9.35905e-07	1
LMTK3	2.87041e-11	0.551884	0.559	0.29	9.59321e-07	1
ARHGAP40	3.38456e-11	0.304523	0.216	0.042	1.13115e-06	1
XKRX	3.46531e-11	0.364386	0.275	0.069	1.15814e-06	1
WFDC12	3.61233e-11	1.59734	0.608	0.316	1.20728e-06	1
LYNX1	3.88185e-11	0.384478	0.265	0.064	1.29735e-06	1
MYZAP	3.89458e-11	0.412004	0.324	0.098	1.30161e-06	1
CAMK1D	4.66357e-11	0.334457	0.529	0.262	1.55861e-06	1
TOB1	4.751e-11	0.745047	0.775	0.632	1.58783e-06	1
ZFAND6	5.12347e-11	0.757637	0.696	0.438	1.71232e-06	1
ARHGEF37	6.50709e-11	0.581451	0.529	0.266	2.17474e-06	1
ZNF800	7.11079e-11	0.455649	0.431	0.171	2.3765e-06	1
IVD	8.27412e-11	0.506731	0.235	0.053	2.76529e-06	1
AL691432.2	8.66971e-11	0.420748	0.353	0.115	2.8975e-06	1
C16orf70	1.06147e-10	0.542273	0.49	0.227	3.54755e-06	1
GSTT2B	1.06462e-10	0.42271	0.157	0.022	3.55806e-06	1
NLRX1	1.07046e-10	0.727088	0.667	0.455	3.5776e-06	1
BRAF	1.37066e-10	0.365862	0.363	0.126	4.58088e-06	1
SLC5A1	1.41761e-10	0.46671	0.471	0.206	4.73781e-06	1
MID2	1.50384e-10	0.382168	0.245	0.059	5.02599e-06	1
PFKFB3	1.51181e-10	0.804051	0.461	0.209	5.05262e-06	1
SH3GL1	1.60181e-10	0.74196	0.824	0.674	5.35341e-06	1
CASZ1	1.65841e-10	0.569442	0.588	0.35	5.54258e-06	1
ZBTB34	2.28582e-10	0.287225	0.304	0.092	7.63943e-06	1
ASGR1	2.38835e-10	0.324572	0.225	0.05	7.98211e-06	1
BTG1	2.42252e-10	0.676657	0.873	0.816	8.09629e-06	1
SFT2D2	2.46836e-10	0.724106	0.765	0.53	8.24951e-06	1
SLC27A4	2.71897e-10	0.654171	0.706	0.555	9.08706e-06	1
PNPLA1	2.7834e-10	0.323602	0.255	0.065	9.3024e-06	1
GRHL1	2.8248e-10	0.586932	0.765	0.592	9.44075e-06	1
RUNDC3A	2.85799e-10	0.461011	0.304	0.095	9.5517e-06	1
RAB5A	2.88701e-10	0.994655	0.784	0.6	9.64868e-06	1
RNF223	2.91382e-10	0.423856	0.206	0.042	9.73829e-06	1
CAST	3.2501e-10	0.835026	0.794	0.67	1.08621e-05	1
SNX21	3.39874e-10	0.469044	0.598	0.364	1.13589e-05	1
MVK	3.69943e-10	0.636948	0.549	0.31	1.23639e-05	1
AKTIP	3.99172e-10	0.473742	0.52	0.249	1.33407e-05	1
HECTD1	4.36613e-10	0.83193	0.657	0.421	1.4592e-05	1
TGM1	4.55942e-10	0.628955	0.814	0.64	1.5238e-05	1
ANKH	4.94463e-10	1.00311	0.578	0.343	1.65254e-05	1
GPR1	5.14774e-10	0.284393	0.48	0.227	1.72042e-05	1
FYCO1	5.28092e-10	0.491052	0.48	0.224	1.76494e-05	1
HIST1H2BD	5.82565e-10	0.459767	0.333	0.117	1.94699e-05	1
SEMA4D	6.85832e-10	0.504796	0.549	0.274	2.29212e-05	1
A2ML1	7.91479e-10	0.686323	0.814	0.671	2.6452e-05	1
CPA4	9.02659e-10	2.03942	0.637	0.402	3.01678e-05	1
FAM220A	9.18214e-10	0.412731	0.343	0.123	3.06876e-05	1
ULK3	9.27891e-10	0.588873	0.578	0.36	3.1011e-05	1
ACAP1	9.57371e-10	0.338637	0.402	0.162	3.19963e-05	1
RAB11FIP1	9.77042e-10	0.632756	0.559	0.315	3.26537e-05	1
EPHB6	9.94525e-10	1.00966	0.588	0.408	3.3238e-05	1
CALML3	1.05917e-09	0.743888	0.931	0.916	3.53986e-05	1
NOL3	1.06497e-09	0.727708	0.569	0.363	3.55923e-05	1
DEGS1	1.34581e-09	0.653597	0.804	0.808	4.49783e-05	1
PAWR	1.43344e-09	0.679966	0.618	0.417	4.79069e-05	1
RBP7	1.49481e-09	0.313642	0.353	0.132	4.9958e-05	1
LYPD5	1.64641e-09	0.678113	0.637	0.374	5.50245e-05	1
PCSK6	1.96858e-09	0.442108	0.461	0.212	6.5792e-05	1
SMAP2	2.0401e-09	0.680329	0.52	0.271	6.81823e-05	1
PCMTD2	2.27845e-09	0.515315	0.471	0.231	7.61481e-05	1
MGST1	2.29047e-09	0.639508	0.725	0.419	7.65497e-05	1
CARD14	2.31426e-09	0.537221	0.363	0.142	7.73448e-05	1
PPP1CB	2.56353e-09	0.522639	0.824	0.793	8.56759e-05	1
GLB1L2	2.58234e-09	0.390338	0.147	0.023	8.63042e-05	1
HPSE	2.67508e-09	0.629569	0.49	0.251	8.94039e-05	1
LYRM1	2.6756e-09	0.361586	0.373	0.145	8.94213e-05	1
PGRMC2	2.72001e-09	0.878608	0.735	0.569	9.09055e-05	1
H3F3A	2.92795e-09	0.438947	0.941	0.897	9.78552e-05	1
FAM214A	3.50725e-09	0.613786	0.402	0.178	0.000117216	1
TDP2	3.66608e-09	0.606327	0.569	0.336	0.000122524	1
OSER1	3.75543e-09	0.875132	0.529	0.29	0.00012551	1
KATNB1	3.82368e-09	0.589323	0.392	0.173	0.000127791	1
PTGS1	3.87663e-09	0.769986	0.608	0.366	0.000129561	1
MIGA2	3.90547e-09	0.324847	0.343	0.128	0.000130525	1
TMEM184A	4.09553e-09	0.676158	0.549	0.307	0.000136877	1
UBL3	4.09576e-09	1.49212	0.578	0.333	0.000136884	1
TRPV3	4.41868e-09	0.662572	0.471	0.221	0.000147677	1
FHDC1	5.53847e-09	0.395272	0.451	0.217	0.000185101	1
ETFDH	5.73943e-09	0.342041	0.382	0.156	0.000191817	1
DUSP14	6.07774e-09	1.05355	0.804	0.66	0.000203124	1
MEGF9	6.23847e-09	0.575117	0.559	0.312	0.000208496	1
UACA	6.27905e-09	0.496451	0.441	0.207	0.000209852	1
SP6	6.30326e-09	0.262351	0.265	0.079	0.000210661	1
MALAT1	6.33121e-09	0.809892	1	0.963	0.000211595	1
ARHGAP29	6.58619e-09	0.801868	0.265	0.081	0.000220117	1
UCHL1	6.64927e-09	0.280481	0.147	0.025	0.000222225	1
VEGFA	6.67141e-09	0.374967	0.441	0.204	0.000222965	1
BSPRY	7.24268e-09	0.370665	0.5	0.263	0.000242057	1
NDRG4	8.54338e-09	0.571155	0.51	0.282	0.000285528	1
SLCO4A1-AS1	8.82795e-09	0.70222	0.127	0.019	0.000295039	1
ACAD8	1.08693e-08	0.333992	0.373	0.154	0.000363264	1
TMEM134	1.13973e-08	0.677259	0.725	0.569	0.000380909	1
CEBPB	1.21496e-08	0.719847	0.765	0.74	0.000406052	1
PSCA	1.21578e-08	1.0634	0.235	0.065	0.000406326	1
AL117379.1	1.27253e-08	0.279611	0.118	0.016	0.000425291	1
SLC11A2	1.35592e-08	0.452733	0.402	0.185	0.000453162	1
AL357033.4	1.48378e-08	0.319445	0.147	0.026	0.000495893	1
TPI1	1.73713e-08	0.462687	0.912	0.852	0.000580566	1
RDH12	2.05231e-08	0.424936	0.578	0.38	0.000685904	1
EIF3F	2.30928e-08	0.590614	0.853	0.745	0.000771785	1
PPP1CC	2.61617e-08	0.88683	0.784	0.645	0.000874349	1
ETV7	3.28269e-08	0.957589	0.471	0.254	0.00109711	1
TNNT1	3.32964e-08	0.548718	0.588	0.383	0.0011128	1
RNASE7	3.35677e-08	1.47187	0.363	0.151	0.00112187	1
BEX3	3.49045e-08	0.603018	0.667	0.453	0.00116654	1
SEMA7A	4.07204e-08	0.409748	0.225	0.064	0.00136092	1
NRDC	4.107e-08	0.900616	0.686	0.48	0.0013726	1
DLX5	4.35333e-08	0.415577	0.441	0.212	0.00145493	1
FAM219B	4.61822e-08	0.525693	0.51	0.282	0.00154346	1
SREK1IP1	4.65927e-08	0.994943	0.725	0.576	0.00155718	1
CYB561D1	4.98067e-08	0.536143	0.324	0.126	0.00166459	1
TREX2	5.03362e-08	0.397342	0.157	0.033	0.00168229	1
DDAH2	5.17327e-08	0.74757	0.529	0.322	0.00172896	1
RAPGEFL1	5.69042e-08	0.379549	0.539	0.327	0.0019018	1
DAGLB	5.82309e-08	0.477306	0.314	0.121	0.00194613	1
ACADVL	5.9046e-08	0.733088	0.735	0.583	0.00197338	1
CHP1	6.19354e-08	0.634569	0.735	0.634	0.00206994	1
SDCBP2	6.19982e-08	0.923038	0.824	0.611	0.00207204	1
ZNF91	6.30617e-08	0.542494	0.324	0.131	0.00210758	1
HTR3A	6.84557e-08	0.29418	0.137	0.025	0.00228786	1
C12orf56	7.00702e-08	0.295509	0.235	0.072	0.00234182	1
CENPT	7.0944e-08	0.553682	0.51	0.304	0.00237102	1
TNFAIP8L3	7.14177e-08	0.322586	0.441	0.227	0.00238685	1
HBP1	7.51492e-08	0.625571	0.598	0.413	0.00251156	1
TOM1	7.59896e-08	0.428215	0.696	0.484	0.00253965	1
PPP4R3A	7.65834e-08	0.729706	0.549	0.344	0.00255949	1
ATG2A	8.79331e-08	0.585274	0.412	0.195	0.00293881	1
TMEM40	9.56231e-08	0.477588	0.882	0.688	0.00319582	1
PMM1	1.06493e-07	0.534982	0.402	0.204	0.00355911	1
ANKRD35	1.12356e-07	0.498073	0.461	0.248	0.00375505	1
EMB	1.31097e-07	0.715098	0.402	0.199	0.0043814	1
PFKFB2	1.40786e-07	0.770034	0.5	0.288	0.00470522	1
NPAS2	1.43677e-07	0.287661	0.343	0.142	0.00480182	1
CDA	1.56607e-07	0.417189	0.706	0.525	0.00523398	1
HOMER2	1.59139e-07	0.501078	0.559	0.346	0.00531858	1
CAMSAP3	1.62565e-07	0.454661	0.471	0.263	0.00543309	1
ZNF117	1.71872e-07	0.270786	0.402	0.207	0.00574415	1
NOD2	1.72427e-07	0.507808	0.412	0.196	0.00576268	1
TEX264	1.74354e-07	0.512071	0.578	0.383	0.00582709	1
SLC39A2	1.81312e-07	0.250051	0.471	0.254	0.00605964	1
PTK6	1.9784e-07	0.454366	0.598	0.421	0.00661202	1
GTF2F2	2.0403e-07	0.730088	0.559	0.383	0.00681889	1
HDAC5	2.1546e-07	0.433716	0.549	0.354	0.00720088	1
MFSD5	2.19916e-07	0.548381	0.657	0.519	0.00734981	1
UBE2R2	2.29069e-07	1.06315	0.686	0.497	0.00765573	1
SLCO4A1	2.30305e-07	0.468989	0.284	0.107	0.00769703	1
AC006333.2	2.363e-07	0.274148	0.284	0.104	0.00789738	1
RHBDL2	2.49291e-07	0.681854	0.353	0.157	0.00833156	1
UBL7	2.70537e-07	0.533479	0.51	0.302	0.00904161	1
CSNK1E	2.8461e-07	0.709244	0.686	0.536	0.00951195	1
ADIPOR1	2.85778e-07	0.658356	0.814	0.704	0.009551	1
DLX3	2.85901e-07	0.264449	0.441	0.224	0.00955508	1
LPCAT2	2.9623e-07	0.727367	0.5	0.28	0.0099003	1
CLASP1	3.09031e-07	0.497292	0.412	0.207	0.0103281	1
KDM3A	3.10355e-07	0.353564	0.471	0.26	0.0103724	1
FFAR2	3.17982e-07	0.251958	0.137	0.028	0.0106273	1
SLC31A2	3.25422e-07	0.680944	0.569	0.399	0.0108759	1
MANSC1	3.31401e-07	0.273267	0.48	0.252	0.0110758	1
CHRNE	3.3302e-07	0.404439	0.333	0.143	0.0111299	1
STX12	3.57042e-07	0.523393	0.588	0.425	0.0119327	1
SNAP29	3.58348e-07	0.594853	0.598	0.427	0.0119763	1
TMEM164	3.65528e-07	0.449813	0.392	0.195	0.0122163	1
GSE1	3.78084e-07	0.348968	0.392	0.192	0.0126359	1
GJA1	4.00345e-07	0.649026	0.951	0.936	0.0133799	1
WDR53	4.11301e-07	0.413645	0.294	0.118	0.0137461	1
AL512274.1	4.13429e-07	0.332955	0.284	0.104	0.0138172	1
TCEAL9	4.48551e-07	0.457949	0.637	0.425	0.014991	1
ZNF770	4.74102e-07	0.536995	0.667	0.531	0.015845	1
IL20RB	4.83268e-07	0.481241	0.686	0.579	0.0161513	1
FASN	4.97572e-07	0.657856	0.667	0.512	0.0166294	1
PLAGL1	5.04211e-07	0.442904	0.363	0.168	0.0168512	1
SMOX	5.30621e-07	0.606777	0.343	0.157	0.0177339	1
ARRDC3	5.55247e-07	0.365386	0.667	0.486	0.0185569	1
ELOVL6	5.55729e-07	0.31162	0.245	0.087	0.018573	1
CNBP	5.78336e-07	0.276603	0.902	0.791	0.0193286	1
CNST	5.83766e-07	0.58086	0.255	0.092	0.0195101	1
RASGEF1B	5.83841e-07	0.397132	0.314	0.131	0.0195125	1
LEPROTL1	6.61471e-07	0.585862	0.627	0.456	0.022107	1
RBBP6	6.78961e-07	0.761599	0.608	0.427	0.0226915	1
DOCK9	6.92196e-07	0.723821	0.578	0.402	0.0231339	1
DCUN1D3	7.29826e-07	0.420485	0.363	0.173	0.0243915	1
LPIN3	7.52268e-07	0.376786	0.333	0.153	0.0251415	1
ID4	8.01631e-07	0.345267	0.324	0.137	0.0267913	1
KIF1B	8.02451e-07	0.699801	0.559	0.354	0.0268187	1
ERRFI1	8.21952e-07	1.16865	0.471	0.287	0.0274705	1
CD164L2	9.19137e-07	0.481843	0.392	0.209	0.0307185	1
ADGRG1	9.34547e-07	0.609966	0.735	0.636	0.0312335	1
SCARB1	9.56291e-07	0.498483	0.353	0.168	0.0319602	1
PKP3	9.80395e-07	0.389663	0.892	0.815	0.0327658	1
ZNF750	1.09634e-06	0.343004	0.735	0.634	0.0366407	1
GK5	1.16149e-06	0.43676	0.373	0.179	0.0388183	1
HILPDA	1.1684e-06	0.712381	0.294	0.126	0.0390491	1
OXR1	1.20323e-06	0.568584	0.441	0.243	0.0402132	1
CLIP1	1.20493e-06	0.419744	0.775	0.615	0.04027	1
FBXO28	1.20531e-06	0.390589	0.559	0.363	0.0402828	1
MAP3K8	1.29246e-06	0.517326	0.48	0.283	0.0431952	1
KNSTRN	1.40041e-06	0.476708	0.216	0.073	0.0468032	1
RAB11A	1.41982e-06	0.383295	0.863	0.844	0.047452	1
CRYBG1	1.44073e-06	0.61647	0.775	0.639	0.0481506	1
CXCL9	1.4136e-32	2.07224	0.947	0.401	4.72441e-28	2
ACTB	1.09828e-31	1.17648	1	0.934	3.67055e-27	2
TNC	1.27825e-28	1.58127	0.973	0.549	4.27205e-24	2
HLA-B	2.63119e-28	1.13299	1	0.945	8.79369e-24	2
B2M	3.07047e-27	1.02228	1	0.949	1.02618e-22	2
HLA-A	5.79464e-26	1.04347	1	0.925	1.93663e-21	2
TMSB4X	1.27693e-25	1.10479	1	0.895	4.26762e-21	2
MMP9	1.50043e-24	1.18308	0.573	0.13	5.01459e-20	2
TMSB10	1.87201e-24	0.979194	1	0.901	6.25645e-20	2
CCL19	5.14861e-24	1.00629	0.373	0.046	1.72072e-19	2
CXCL11	9.03211e-24	1.55515	0.733	0.247	3.01862e-19	2
MPEG1	1.36131e-23	0.90538	0.6	0.151	4.54962e-19	2
MMP1	1.37693e-23	1.91816	0.92	0.465	4.60184e-19	2
HLA-C	3.75615e-23	0.932908	0.987	0.876	1.25534e-18	2
TYMP	1.00905e-22	1.24213	0.987	0.685	3.37233e-18	2
IL32	2.78531e-22	1.04025	0.693	0.229	9.30879e-18	2
LAP3	4.29908e-22	1.13775	0.96	0.665	1.4368e-17	2
SERPING1	5.45399e-22	1.27717	0.92	0.584	1.82278e-17	2
CTGF	6.25539e-22	1.37831	0.6	0.163	2.09062e-17	2
C1QA	6.38424e-22	1.42798	0.84	0.353	2.13368e-17	2
UBD	7.81602e-22	0.544729	0.307	0.033	2.61219e-17	2
CD6	8.30401e-22	0.545778	0.347	0.043	2.77528e-17	2
FCGR2A	8.47152e-22	0.881423	0.56	0.141	2.83127e-17	2
HAPLN3	1.17266e-21	0.738851	0.6	0.163	3.91916e-17	2
HLA-DRA	2.47213e-21	1.55628	0.987	0.803	8.26211e-17	2
SRGN	4.15548e-21	1.56216	0.733	0.291	1.3888e-16	2
CD7	4.75572e-21	0.911767	0.52	0.127	1.58941e-16	2
SAT1	5.97267e-21	1.09781	0.973	0.752	1.99613e-16	2
CXCL10	5.98781e-21	1.69431	0.827	0.384	2.00119e-16	2
CCL21	1.24005e-20	2.04729	0.747	0.284	4.14438e-16	2
S100A6	1.38259e-20	1.14689	1	0.845	4.62075e-16	2
IFITM3	1.53207e-20	1.12035	0.987	0.735	5.12033e-16	2
HLA-DPA1	1.72824e-20	1.3485	0.96	0.62	5.77596e-16	2
CALHM6	2.01862e-20	0.589919	0.333	0.045	6.74643e-16	2
VIM	2.10325e-20	1.50001	1	0.725	7.02929e-16	2
CD74	4.45931e-20	1.75731	1	0.804	1.49034e-15	2
COTL1	4.49174e-20	1.20453	0.867	0.477	1.50118e-15	2
IGFBP7	6.68828e-20	1.50444	0.92	0.519	2.23529e-15	2
IRF8	1.40668e-19	0.782024	0.493	0.112	4.70127e-15	2
HLA-E	1.49069e-19	0.920641	1	0.855	4.98202e-15	2
LYZ	1.61713e-19	1.5306	0.853	0.45	5.4046e-15	2
NNMT	1.7003e-19	0.905773	0.707	0.257	5.68258e-15	2
LUM	4.08405e-19	1.44086	0.827	0.392	1.36493e-14	2
C1S	4.59688e-19	1.08096	0.92	0.556	1.53632e-14	2
TAP1	6.66635e-19	1.14354	0.973	0.703	2.22796e-14	2
WARS	7.19409e-19	1.61744	0.933	0.709	2.40434e-14	2
SECTM1	1.73458e-18	1.12781	0.693	0.262	5.79714e-14	2
ADGRE5	2.12275e-18	0.934533	0.533	0.146	7.09446e-14	2
VCAM1	2.23878e-18	0.834923	0.44	0.094	7.48223e-14	2
TAGLN2	2.29134e-18	0.76597	1	0.831	7.65788e-14	2
BST2	3.43963e-18	1.06006	0.813	0.389	1.14956e-13	2
IRF1	3.74631e-18	1.14656	0.707	0.306	1.25205e-13	2
SPARC	4.61716e-18	1.34001	0.987	0.695	1.5431e-13	2
FXYD5	5.18328e-18	1.08984	0.867	0.555	1.7323e-13	2
TUBA1B	5.79221e-18	0.978759	0.987	0.777	1.93581e-13	2
TNFRSF1B	1.04183e-17	0.82	0.48	0.126	3.48191e-13	2
SELPLG	1.16261e-17	0.590464	0.36	0.064	3.88557e-13	2
SELL	1.36926e-17	0.828719	0.333	0.052	4.57619e-13	2
COL4A2	1.42146e-17	1.209	0.813	0.414	4.75066e-13	2
TIMP1	1.72319e-17	1.54163	0.8	0.416	5.75907e-13	2
MMP14	1.98402e-17	0.993548	0.653	0.257	6.6308e-13	2
CCR7	2.92908e-17	0.648443	0.253	0.028	9.78927e-13	2
COL6A2	7.01174e-17	1.27652	0.92	0.552	2.34339e-12	2
SAMSN1	8.05427e-17	0.649538	0.333	0.057	2.69182e-12	2
MT2A	1.04338e-16	0.925049	1	0.773	3.48709e-12	2
CYR61	1.19979e-16	0.832111	0.48	0.129	4.00981e-12	2
VOPP1	1.25544e-16	0.720863	0.56	0.175	4.19581e-12	2
LGALS1	1.36759e-16	1.36211	0.853	0.549	4.57063e-12	2
ADAM19	1.46752e-16	0.555107	0.32	0.051	4.90462e-12	2
IL2RG	1.57883e-16	0.538173	0.467	0.117	5.27661e-12	2
COL1A2	2.65875e-16	1.25718	0.987	0.779	8.88581e-12	2
ARPC1B	2.82723e-16	0.942519	0.84	0.505	9.44888e-12	2
C1QB	3.82371e-16	0.933169	0.507	0.151	1.27792e-11	2
CCL8	4.96183e-16	0.622326	0.32	0.055	1.65829e-11	2
A2M	5.51514e-16	1.49464	0.76	0.374	1.84321e-11	2
TGFBR2	6.09614e-16	0.843035	0.773	0.41	2.03739e-11	2
TGM2	6.15502e-16	0.260662	0.16	0.009	2.05707e-11	2
TGFBI	6.32333e-16	1.30592	0.853	0.544	2.11332e-11	2
TAPBP	7.12167e-16	0.632142	0.893	0.689	2.38013e-11	2
ITGA5	8.41138e-16	0.602672	0.493	0.139	2.81117e-11	2
HLA-DPB1	8.69062e-16	1.38574	0.867	0.583	2.90449e-11	2
LAYN	9.35666e-16	0.331182	0.253	0.033	3.12709e-11	2
FTH1	1.11695e-15	0.852184	1	0.816	3.73297e-11	2
GBP4	1.47465e-15	0.951272	0.533	0.172	4.92844e-11	2
GBP1	1.57429e-15	0.95157	0.867	0.561	5.26144e-11	2
DUSP4	1.67555e-15	0.626452	0.533	0.167	5.59985e-11	2
THBS1	1.8474e-15	0.886664	0.573	0.202	6.1742e-11	2
FLNA	1.85364e-15	0.833966	0.933	0.726	6.19507e-11	2
OLFML2B	1.90438e-15	0.672717	0.333	0.063	6.36461e-11	2
PTPRC	2.25395e-15	0.670453	0.547	0.179	7.53294e-11	2
CD4	2.76741e-15	0.873	0.413	0.103	9.24897e-11	2
S100A4	3.04085e-15	1.26369	0.893	0.61	1.01628e-10	2
PLEK	3.08853e-15	0.49708	0.293	0.048	1.03222e-10	2
PLEKHO1	4.29488e-15	0.633229	0.467	0.135	1.43539e-10	2
AEBP1	4.58098e-15	1.03331	0.76	0.366	1.53101e-10	2
JCHAIN	4.80711e-15	1.12418	0.533	0.166	1.60658e-10	2
CCL22	5.04093e-15	0.954924	0.48	0.141	1.68473e-10	2
PSAP	5.06647e-15	0.677717	0.973	0.842	1.69327e-10	2
GBP5	5.97265e-15	0.976171	0.547	0.191	1.99612e-10	2
KCNN4	6.17096e-15	0.297738	0.173	0.013	2.0624e-10	2
PFN1	6.91247e-15	0.664889	1	0.87	2.31022e-10	2
ACTN1	7.25023e-15	0.855779	0.84	0.529	2.4231e-10	2
TNFRSF4	7.7554e-15	0.709876	0.32	0.063	2.59193e-10	2
CD63	8.87684e-15	0.948331	0.92	0.712	2.96673e-10	2
FN1	9.96512e-15	1.27176	0.747	0.378	3.33044e-10	2
FSTL1	1.06348e-14	1.08527	0.707	0.323	3.55424e-10	2
HSPG2	1.06793e-14	0.884978	0.747	0.348	3.56912e-10	2
WIPF1	1.15802e-14	0.555088	0.507	0.152	3.87021e-10	2
LCP1	1.32432e-14	1.17712	0.707	0.35	4.426e-10	2
CTSZ	1.3549e-14	0.694242	0.44	0.12	4.52822e-10	2
IDO1	1.61774e-14	0.822953	0.413	0.108	5.40665e-10	2
CORO1A	2.38121e-14	0.795277	0.573	0.218	7.95823e-10	2
EFHD2	2.47115e-14	0.758672	0.76	0.422	8.25885e-10	2
CFL1	2.48018e-14	0.516025	0.987	0.868	8.28902e-10	2
PSMB9	2.53464e-14	0.691774	0.8	0.432	8.47101e-10	2
IFIT3	2.66444e-14	1.0109	0.773	0.428	8.90483e-10	2
MX1	3.09186e-14	0.942907	0.88	0.581	1.03333e-09	2
ICAM1	3.10497e-14	0.664857	0.4	0.109	1.03771e-09	2
FTL	3.19549e-14	0.826785	1	0.8	1.06796e-09	2
PRRX1	3.47706e-14	0.611642	0.64	0.239	1.16207e-09	2
RHOC	3.90125e-14	0.794269	0.827	0.505	1.30384e-09	2
SULF1	4.02555e-14	0.552611	0.253	0.037	1.34538e-09	2
ATP2A3	4.05539e-14	0.800526	0.36	0.084	1.35535e-09	2
COL6A1	4.37748e-14	1.0292	0.893	0.602	1.463e-09	2
TGFB3	5.25561e-14	0.376021	0.293	0.054	1.75648e-09	2
PRSS23	5.70213e-14	1.016	0.813	0.49	1.90571e-09	2
CCL13	5.72282e-14	0.514187	0.2	0.022	1.91262e-09	2
FOXP3	6.26967e-14	0.3413	0.267	0.043	2.09539e-09	2
TMEM176B	7.25361e-14	0.546837	0.307	0.06	2.42423e-09	2
IGLC2	8.82261e-14	1.70039	0.587	0.244	2.94861e-09	2
HSP90B1	1.00665e-13	0.62867	0.947	0.768	3.36432e-09	2
ARPC5	1.1141e-13	0.909334	0.88	0.67	3.72345e-09	2
MSN	1.11661e-13	0.735275	0.893	0.622	3.73182e-09	2
HLA-DRB1	1.14741e-13	0.846888	0.787	0.43	3.83478e-09	2
GZMB	1.29962e-13	0.836695	0.467	0.151	4.34345e-09	2
COL1A1	1.47804e-13	1.09757	0.96	0.785	4.93975e-09	2
MYADM	1.50219e-13	0.699414	0.52	0.179	5.02047e-09	2
SERPINH1	1.50939e-13	0.966068	0.813	0.511	5.04454e-09	2
GNAI2	1.70993e-13	0.914069	0.893	0.641	5.71477e-09	2
GNLY	2.0824e-13	0.940461	0.533	0.191	6.95958e-09	2
LAPTM5	2.47697e-13	1.02477	0.653	0.302	8.27829e-09	2
RIN3	2.51214e-13	0.530572	0.36	0.088	8.39581e-09	2
TNFRSF18	2.63089e-13	0.614929	0.467	0.151	8.79269e-09	2
PMP22	2.84936e-13	0.790681	0.56	0.212	9.52284e-09	2
SLC38A2	2.95985e-13	0.715324	0.947	0.75	9.89212e-09	2
COL5A2	3.84608e-13	0.934394	0.653	0.306	1.2854e-08	2
ISG15	4.65635e-13	1.09751	0.973	0.691	1.5562e-08	2
STAT2	4.72372e-13	0.805453	0.827	0.538	1.57871e-08	2
COL15A1	6.04754e-13	1.03202	0.467	0.151	2.02115e-08	2
TRBC2	6.13481e-13	1.01374	0.613	0.274	2.05031e-08	2
CALR	6.49692e-13	0.665951	0.973	0.804	2.17134e-08	2
ANXA5	6.55923e-13	0.881326	0.827	0.599	2.19216e-08	2
ADAMTS2	6.56495e-13	0.604369	0.413	0.12	2.19407e-08	2
APOL1	6.63147e-13	0.76117	0.68	0.345	2.2163e-08	2
CTSS	6.64615e-13	0.799891	0.573	0.23	2.22121e-08	2
LILRB2	7.17917e-13	0.308765	0.2	0.025	2.39935e-08	2
JAK3	8.18076e-13	0.518259	0.387	0.1	2.73409e-08	2
ITGB1	9.34683e-13	0.783053	0.88	0.646	3.1238e-08	2
CAV1	1.01566e-12	0.953525	0.853	0.617	3.39445e-08	2
EMILIN1	1.12052e-12	0.478306	0.32	0.07	3.74488e-08	2
COL4A1	1.14025e-12	1.20435	0.733	0.43	3.81083e-08	2
COL12A1	1.16188e-12	0.771152	0.653	0.293	3.88313e-08	2
PLXND1	1.21776e-12	0.624555	0.44	0.133	4.06988e-08	2
APOL2	1.23792e-12	0.706277	0.653	0.335	4.13724e-08	2
CTSK	1.33235e-12	0.805951	0.613	0.256	4.45284e-08	2
LY6E	1.3485e-12	0.80116	0.92	0.71	4.50683e-08	2
CCL2	1.52119e-12	0.590883	0.44	0.138	5.08396e-08	2
CXCL13	1.54667e-12	0.992501	0.347	0.087	5.16912e-08	2
PSME2	1.67786e-12	0.646475	0.973	0.683	5.60758e-08	2
KLF2	1.76591e-12	0.696862	0.48	0.161	5.90185e-08	2
MYH9	1.98434e-12	0.729786	0.933	0.758	6.63185e-08	2
ECSCR	2.02392e-12	0.499875	0.24	0.039	6.76416e-08	2
HLA-F	2.21287e-12	0.691169	0.84	0.555	7.39562e-08	2
RNASE1	2.3305e-12	0.997095	0.573	0.233	7.78876e-08	2
FMOD	2.43493e-12	0.458483	0.52	0.176	8.13778e-08	2
TP53I11	2.50027e-12	0.766176	0.493	0.184	8.35616e-08	2
F2R	2.81021e-12	0.780399	0.573	0.245	9.39199e-08	2
SAMHD1	3.19006e-12	0.635337	0.72	0.366	1.06615e-07	2
S100A2	3.23271e-12	0.817687	1	0.945	1.08041e-07	2
TPM3	3.34948e-12	0.685722	0.92	0.706	1.11943e-07	2
SERPINF1	3.81293e-12	0.908746	0.587	0.251	1.27432e-07	2
DPYSL2	4.14392e-12	0.718904	0.573	0.236	1.38494e-07	2
CCL5	4.37259e-12	0.997047	0.627	0.314	1.46136e-07	2
CYBA	4.80567e-12	0.894206	0.653	0.33	1.6061e-07	2
IER3	4.90142e-12	0.648692	0.56	0.241	1.6381e-07	2
C1R	5.14313e-12	0.597004	0.893	0.616	1.71889e-07	2
MRC1	5.16557e-12	0.578334	0.307	0.069	1.72638e-07	2
NUCB1	6.04744e-12	0.60018	0.76	0.477	2.02111e-07	2
CTHRC1	6.07338e-12	0.524176	0.333	0.081	2.02978e-07	2
NKG7	6.20992e-12	0.712925	0.4	0.117	2.07542e-07	2
ECE1	6.27284e-12	0.646136	0.44	0.146	2.09644e-07	2
ANXA1	7.09244e-12	0.822483	0.973	0.81	2.37036e-07	2
MX2	8.06412e-12	0.843611	0.72	0.384	2.69511e-07	2
COL3A1	8.73036e-12	0.998107	0.907	0.703	2.91777e-07	2
LTB	9.0172e-12	0.661047	0.387	0.114	3.01364e-07	2
IGFBP4	9.24702e-12	0.83517	0.72	0.374	3.09044e-07	2
ELK3	1.2238e-11	0.552936	0.6	0.278	4.09006e-07	2
CD93	1.38946e-11	0.718667	0.4	0.123	4.64371e-07	2
EGFL7	1.45294e-11	0.652689	0.453	0.149	4.85586e-07	2
SPINK6	1.51362e-11	1.09995	0.787	0.493	5.05866e-07	2
CYTOR	1.65864e-11	0.558446	0.52	0.212	5.54333e-07	2
COL6A3	1.71628e-11	1.17424	0.68	0.356	5.73599e-07	2
MYL6	1.73762e-11	0.474056	1	0.877	5.80729e-07	2
LCK	1.96205e-11	0.491213	0.267	0.057	6.55737e-07	2
ACTG1	2.15103e-11	0.45689	1	0.93	7.18895e-07	2
SOCS3	2.16529e-11	0.610435	0.387	0.117	7.23662e-07	2
RASA3	2.18569e-11	0.367972	0.24	0.043	7.30479e-07	2
LASP1	2.528e-11	0.812672	0.68	0.389	8.44884e-07	2
MGAT1	2.54614e-11	0.817751	0.787	0.516	8.50944e-07	2
VAMP5	2.54734e-11	0.862445	0.533	0.223	8.51345e-07	2
CD99	2.55421e-11	0.701961	0.907	0.625	8.53643e-07	2
SPARCL1	2.96408e-11	0.904864	0.427	0.141	9.90626e-07	2
FCER1G	2.97889e-11	0.744529	0.467	0.179	9.95574e-07	2
PDIA3	3.01534e-11	0.403979	0.92	0.728	1.00776e-06	2
STAT1	3.17192e-11	0.563278	0.96	0.749	1.06009e-06	2
LAMC2	3.52942e-11	1.069	0.707	0.448	1.17957e-06	2
PRNP	3.67134e-11	0.914378	0.92	0.747	1.227e-06	2
ANXA6	4.14511e-11	0.672738	0.493	0.184	1.38534e-06	2
SSBP4	4.26927e-11	0.668696	0.493	0.19	1.42683e-06	2
NR4A1	4.27128e-11	0.487461	0.24	0.046	1.42751e-06	2
ALOX5AP	4.95283e-11	0.994139	0.467	0.178	1.65529e-06	2
ANGPTL2	5.62467e-11	0.710764	0.413	0.142	1.87982e-06	2
SLC15A3	5.71945e-11	0.399413	0.36	0.105	1.9115e-06	2
LAMP3	5.75062e-11	0.532373	0.56	0.242	1.92191e-06	2
C4orf48	6.1301e-11	0.375137	0.333	0.09	2.04874e-06	2
SRPX	6.2197e-11	0.536831	0.28	0.064	2.07868e-06	2
FKBP1A	6.55483e-11	0.69046	0.907	0.703	2.19069e-06	2
CTSC	6.71576e-11	0.734694	0.907	0.72	2.24447e-06	2
GGT5	6.9474e-11	0.552775	0.4	0.126	2.32189e-06	2
IGKC	7.23282e-11	0.335395	0.813	0.556	2.41728e-06	2
PML	7.46445e-11	0.701388	0.747	0.487	2.49469e-06	2
IGHM	7.85986e-11	0.883823	0.413	0.139	2.62684e-06	2
MXRA8	8.15996e-11	0.300132	0.347	0.093	2.72714e-06	2
AIF1	8.47874e-11	0.816994	0.493	0.202	2.83368e-06	2
KRT75	8.52088e-11	1.09837	0.707	0.407	2.84776e-06	2
KLF6	8.6224e-11	0.728044	0.853	0.655	2.88169e-06	2
HLA-DMB	8.62795e-11	0.70582	0.507	0.202	2.88355e-06	2
MMP2	8.70656e-11	0.744599	0.533	0.218	2.90982e-06	2
CLIC1	9.53672e-11	0.578216	0.933	0.768	3.18727e-06	2
ARHGDIA	1.03669e-10	0.643386	0.88	0.712	3.46471e-06	2
CHN1	1.10171e-10	0.33449	0.227	0.042	3.68204e-06	2
RNF19B	1.1882e-10	0.614141	0.667	0.378	3.97107e-06	2
LYN	1.38051e-10	0.566325	0.493	0.199	4.6138e-06	2
MCL1	1.38258e-10	0.443089	0.867	0.65	4.62072e-06	2
SPOCK2	1.40896e-10	0.459672	0.293	0.072	4.70888e-06	2
CFH	1.60538e-10	0.785604	0.48	0.187	5.36534e-06	2
LAMB3	1.60667e-10	0.952993	0.8	0.605	5.36964e-06	2
RHOA	1.71364e-10	0.58885	0.96	0.813	5.72714e-06	2
HLA-DRB5	1.80167e-10	0.845602	0.667	0.357	6.02136e-06	2
HLA-DOA	1.83145e-10	0.420574	0.307	0.076	6.1209e-06	2
CIITA	1.99296e-10	0.476015	0.32	0.088	6.66068e-06	2
IL3RA	2.02749e-10	0.691737	0.253	0.055	6.77608e-06	2
CD83	2.12001e-10	0.754981	0.36	0.108	7.08529e-06	2
ANXA3	2.2192e-10	0.69081	0.653	0.363	7.4168e-06	2
TAP2	2.24799e-10	0.670567	0.76	0.52	7.51299e-06	2
CAPG	2.2968e-10	0.595993	0.893	0.67	7.67615e-06	2
UBE2L6	2.61574e-10	0.669082	0.787	0.52	8.74207e-06	2
PLEC	2.61609e-10	0.444136	0.867	0.668	8.74322e-06	2
SYNGR2	2.6425e-10	0.569919	0.84	0.685	8.83151e-06	2
IFIT2	2.82926e-10	0.788065	0.48	0.194	9.45568e-06	2
FBN1	3.19676e-10	0.672782	0.493	0.196	1.06839e-05	2
PGGHG	3.22858e-10	0.4052	0.173	0.025	1.07903e-05	2
ERAP2	3.23211e-10	0.634257	0.64	0.341	1.0802e-05	2
CLDN5	3.43744e-10	0.675122	0.293	0.075	1.14883e-05	2
DCN	3.48786e-10	0.62062	0.933	0.682	1.16568e-05	2
ISG20	3.49525e-10	0.634849	0.733	0.428	1.16815e-05	2
RAMP2	3.58307e-10	0.483581	0.293	0.073	1.1975e-05	2
EMP3	3.6553e-10	0.64515	0.587	0.299	1.22164e-05	2
GRN	3.73301e-10	0.577853	0.987	0.812	1.24761e-05	2
CD81	3.78599e-10	0.620716	0.907	0.749	1.26532e-05	2
CXCR4	3.85132e-10	0.843504	0.333	0.097	1.28715e-05	2
PREX1	4.51829e-10	0.473617	0.293	0.076	1.51006e-05	2
HSP90AA1	4.64491e-10	0.582813	0.973	0.852	1.55237e-05	2
SPHK1	4.83228e-10	0.593041	0.573	0.296	1.615e-05	2
A4GALT	5.15746e-10	0.280971	0.173	0.025	1.72368e-05	2
RAC2	5.64726e-10	0.543567	0.373	0.124	1.88737e-05	2
GMFG	5.89474e-10	0.783696	0.427	0.158	1.97008e-05	2
SYNPO	5.90086e-10	0.482585	0.427	0.154	1.97213e-05	2
CYB5R3	6.27513e-10	0.707702	0.827	0.598	2.09721e-05	2
CD53	6.43842e-10	0.421004	0.32	0.09	2.15178e-05	2
PDGFRB	6.71004e-10	0.900235	0.493	0.205	2.24256e-05	2
PSME1	7.16359e-10	0.558838	0.947	0.714	2.39414e-05	2
DSE	7.73019e-10	0.625432	0.587	0.305	2.58351e-05	2
TNFRSF21	7.73567e-10	0.669078	0.733	0.463	2.58534e-05	2
CD163	8.79451e-10	0.343803	0.227	0.046	2.93921e-05	2
BATF3	8.81286e-10	0.397962	0.16	0.022	2.94534e-05	2
ENTPD1	9.65842e-10	0.471219	0.373	0.124	3.22794e-05	2
EPSTI1	9.75826e-10	0.554273	0.627	0.342	3.26131e-05	2
BGN	9.93009e-10	0.634135	0.693	0.396	3.31874e-05	2
ITGA6	1.02412e-09	0.666495	0.827	0.652	3.42272e-05	2
ETS1	1.04125e-09	0.554509	0.56	0.269	3.47997e-05	2
BCAR1	1.13265e-09	0.644646	0.587	0.294	3.78544e-05	2
IL21R	1.29616e-09	0.261125	0.133	0.015	4.33189e-05	2
IL4I1	1.37594e-09	0.401256	0.24	0.054	4.59852e-05	2
ARPC4	1.39487e-09	0.649314	0.88	0.701	4.66178e-05	2
TIMP2	1.53316e-09	0.664045	0.773	0.489	5.12398e-05	2
FGL2	1.60887e-09	0.530817	0.52	0.226	5.37702e-05	2
APOL6	1.70313e-09	0.62181	0.76	0.517	5.69202e-05	2
CTLA4	1.76074e-09	0.289436	0.187	0.031	5.88455e-05	2
SNX20	1.86596e-09	0.541698	0.227	0.049	6.23623e-05	2
SH3TC1	1.95797e-09	0.361781	0.32	0.093	6.54373e-05	2
FYN	2.04654e-09	0.517139	0.413	0.155	6.83975e-05	2
CCM2	2.05437e-09	0.39043	0.72	0.45	6.86592e-05	2
SERPINE2	2.14602e-09	0.718334	0.733	0.439	7.17223e-05	2
RGS1	2.26828e-09	0.423924	0.32	0.096	7.58083e-05	2
CD44	2.44773e-09	0.434955	1	0.818	8.18056e-05	2
GNB1	2.46496e-09	0.5481	0.827	0.629	8.23814e-05	2
MAPKAPK2	2.62789e-09	0.634601	0.733	0.498	8.78269e-05	2
TWIST2	3.0072e-09	0.470825	0.373	0.124	0.000100504	2
TUBB	3.00724e-09	0.654221	0.973	0.756	0.000100505	2
VCAN	3.05173e-09	0.766418	0.453	0.178	0.000101992	2
BATF2	3.06683e-09	0.364941	0.333	0.103	0.000102496	2
COL18A1	3.14022e-09	0.630943	0.813	0.532	0.000104949	2
CD59	3.30464e-09	0.565413	0.867	0.737	0.000110444	2
PLSCR1	3.59371e-09	0.600936	0.76	0.498	0.000120105	2
TM4SF1	3.73594e-09	0.492601	0.747	0.439	0.000124859	2
ODC1	3.75806e-09	0.634198	0.72	0.433	0.000125598	2
MET	3.9136e-09	0.354988	0.427	0.166	0.000130796	2
IL15RA	4.04972e-09	0.542524	0.453	0.19	0.000135346	2
JADE2	4.31208e-09	0.395557	0.2	0.04	0.000144114	2
DAZAP2	4.61702e-09	0.676394	0.84	0.686	0.000154305	2
APP	4.85756e-09	0.468741	0.907	0.749	0.000162345	2
CST7	5.22514e-09	0.489758	0.387	0.142	0.000174629	2
IFI6	5.41747e-09	0.713266	1	0.815	0.000181057	2
SERPINE1	5.49402e-09	0.534763	0.4	0.152	0.000183616	2
PIK3AP1	5.62388e-09	0.365815	0.173	0.03	0.000187956	2
CLEC14A	5.80355e-09	0.438862	0.253	0.063	0.00019396	2
IFITM2	5.83204e-09	0.726445	0.507	0.232	0.000194912	2
HLA-DQB1	6.33837e-09	0.758202	0.693	0.436	0.000211835	2
DEPP1	6.37576e-09	0.361809	0.2	0.04	0.000213084	2
FPR1	6.61203e-09	0.399102	0.227	0.052	0.000220981	2
IL1R2	6.63217e-09	0.500129	0.507	0.23	0.000221654	2
RAC1	6.64592e-09	0.378625	0.96	0.824	0.000222113	2
STOM	6.77432e-09	0.726931	0.76	0.556	0.000226405	2
OAS2	6.78143e-09	0.565892	0.707	0.43	0.000226642	2
TRBC1	7.16727e-09	0.688693	0.32	0.103	0.000239537	2
CCL18	7.66702e-09	0.469012	0.253	0.064	0.000256239	2
MCRIP1	7.95247e-09	0.49655	0.533	0.268	0.000265779	2
LBH	8.37023e-09	0.710678	0.533	0.26	0.000279741	2
MFAP2	8.94247e-09	0.383315	0.4	0.149	0.000298866	2
MVP	9.56156e-09	0.527888	0.787	0.523	0.000319557	2
LIMA1	9.79482e-09	0.541091	0.827	0.549	0.000327353	2
UNC93B1	1.00553e-08	0.447763	0.467	0.193	0.000336057	2
TUBA1A	1.00562e-08	0.793503	0.72	0.535	0.000336087	2
ZYX	1.06175e-08	0.639848	0.787	0.572	0.000354848	2
IGFBP3	1.0674e-08	0.256482	0.893	0.526	0.000356736	2
TNFRSF14	1.12066e-08	0.347808	0.413	0.158	0.000374536	2
PDIA4	1.13914e-08	0.714916	0.76	0.552	0.000380711	2
CD274	1.34048e-08	0.408912	0.333	0.112	0.000448002	2
TRIM38	1.34053e-08	0.390272	0.36	0.129	0.000448018	2
RNF213	1.37306e-08	0.659888	0.653	0.401	0.000458891	2
UBC	1.40569e-08	0.370148	0.973	0.885	0.000469795	2
MMP11	1.53761e-08	0.428876	0.307	0.093	0.000513886	2
PECAM1	1.58899e-08	0.788049	0.413	0.164	0.000531057	2
CTSL	1.59282e-08	0.632192	0.747	0.528	0.000532337	2
MARCKSL1	1.61623e-08	0.64672	0.667	0.426	0.00054016	2
SORL1	1.6453e-08	0.470214	0.427	0.178	0.000549876	2
PTHLH	1.6942e-08	0.612061	0.48	0.218	0.000566218	2
LSP1	1.69838e-08	0.762356	0.587	0.327	0.000567615	2
PLAC8	1.73462e-08	0.250818	0.107	0.01	0.000579727	2
PEA15	1.7953e-08	0.509507	0.733	0.534	0.000600006	2
LGMN	1.80042e-08	0.604358	0.68	0.459	0.000601717	2
MUC1	2.10769e-08	0.461422	0.427	0.172	0.000704409	2
LCP2	2.20688e-08	0.381911	0.267	0.075	0.000737563	2
CMPK2	2.2902e-08	0.616827	0.573	0.296	0.000765407	2
MBNL1	2.33345e-08	0.400731	0.76	0.519	0.000779862	2
RUNX1	2.34028e-08	0.672978	0.467	0.223	0.000782144	2
MYL9	2.44141e-08	0.675204	0.4	0.154	0.000815944	2
ARL6IP1	2.45895e-08	0.630452	0.787	0.596	0.000821805	2
FST	2.52981e-08	0.505893	0.533	0.256	0.000845489	2
RCN1	2.63276e-08	0.506952	0.493	0.229	0.000879896	2
GLIPR2	2.74693e-08	0.527345	0.36	0.133	0.000918051	2
LMNA	2.75483e-08	0.438495	0.933	0.825	0.000920693	2
RALA	2.83178e-08	0.563944	0.747	0.558	0.000946411	2
CYBB	2.84628e-08	0.275674	0.213	0.049	0.000951256	2
H1FX	2.96003e-08	0.583198	0.893	0.694	0.000989272	2
TIMP3	2.96987e-08	0.537174	0.493	0.235	0.000992561	2
CD14	3.03714e-08	0.644325	0.413	0.167	0.00101504	2
CD86	3.07342e-08	0.345101	0.24	0.063	0.00102717	2
CSGALNACT1	3.08566e-08	0.350641	0.24	0.064	0.00103126	2
CMTM3	3.0913e-08	0.341139	0.373	0.136	0.00103314	2
PPP1R16B	3.21255e-08	0.432004	0.187	0.039	0.00107367	2
HMGB2	3.37636e-08	0.811219	0.72	0.429	0.00112841	2
S100A10	3.41266e-08	0.529082	0.987	0.848	0.00114055	2
2024-09-09	3.65992e-08	0.636068	0.76	0.534	0.00122318	2
HIF1A	3.70162e-08	0.507268	0.84	0.709	0.00123712	2
AAED1	3.76453e-08	0.317679	0.373	0.136	0.00125814	2
PKM	3.77724e-08	0.448407	0.973	0.828	0.00126239	2
TNFSF10	3.8287e-08	0.594384	0.773	0.607	0.00127959	2
IL7R	3.83371e-08	0.273318	0.293	0.088	0.00128127	2
SCARB2	3.89094e-08	0.487832	0.747	0.544	0.00130039	2
SOD2	3.91978e-08	0.622257	0.667	0.402	0.00131003	2
GPR183	3.94886e-08	0.31915	0.267	0.076	0.00131975	2
ATP5F1E	4.14047e-08	0.458086	0.987	0.868	0.00138379	2
CDC42SE2	4.17107e-08	0.75332	0.56	0.314	0.00139401	2
CD2	4.20548e-08	0.499575	0.333	0.12	0.00140551	2
AQP1	4.28291e-08	0.643264	0.52	0.25	0.00143139	2
SF1	4.29821e-08	0.511056	0.76	0.595	0.0014365	2
PTP4A2	4.40834e-08	0.728801	0.747	0.559	0.00147331	2
COL5A1	4.43405e-08	0.560909	0.613	0.353	0.00148191	2
MIR4435-2HG	4.58097e-08	0.440005	0.413	0.175	0.00153101	2
PHC2	4.76146e-08	0.458954	0.627	0.389	0.00159133	2
2024-09-01	4.77778e-08	0.314642	0.227	0.057	0.00159678	2
PMEPA1	4.83536e-08	0.53839	0.547	0.286	0.00161603	2
PDPN	5.02222e-08	0.550331	0.56	0.314	0.00167848	2
MORF4L1	5.03621e-08	0.53084	0.933	0.737	0.00168315	2
SSR3	5.15908e-08	0.465437	0.827	0.611	0.00172422	2
TCF4	5.23283e-08	0.724273	0.6	0.351	0.00174886	2
CALM3	5.4471e-08	0.522393	0.787	0.583	0.00182048	2
CAPNS1	5.47101e-08	0.522264	0.84	0.643	0.00182847	2
TMBIM6	6.0192e-08	0.435898	0.96	0.813	0.00201168	2
BASP1	6.2567e-08	0.502185	0.667	0.413	0.00209105	2
B4GALT1	6.40503e-08	0.486384	0.733	0.55	0.00214063	2
CCL4	6.54646e-08	0.277208	0.2	0.045	0.00218789	2
ARHGDIB	6.67375e-08	0.806447	0.68	0.484	0.00223043	2
UCP2	6.81399e-08	0.44558	0.307	0.102	0.0022773	2
NT5E	7.17469e-08	0.379316	0.347	0.12	0.00239785	2
GJA4	7.17552e-08	0.403767	0.173	0.034	0.00239813	2
PDIA6	7.52859e-08	0.458454	0.867	0.668	0.00251613	2
TAGLN	7.71171e-08	0.642347	0.427	0.175	0.00257733	2
CMKLR1	7.80813e-08	0.366389	0.16	0.03	0.00260956	2
SH2D1A	8.07448e-08	0.287692	0.107	0.012	0.00269857	2
RAPGEF1	8.10029e-08	0.567467	0.48	0.224	0.0027072	2
ARID5A	8.22173e-08	0.382841	0.333	0.12	0.00274778	2
INHBA	8.25957e-08	0.472331	0.387	0.154	0.00276043	2
ITGA3	8.5154e-08	0.45981	0.747	0.528	0.00284593	2
PTBP1	8.56712e-08	0.522148	0.867	0.68	0.00286322	2
CALD1	9.01387e-08	0.575917	0.6	0.351	0.00301252	2
TSC22D3	9.02982e-08	0.546197	0.493	0.251	0.00301786	2
CTSB	9.20908e-08	0.583545	0.92	0.813	0.00307777	2
SLC16A3	9.69228e-08	0.326357	0.227	0.058	0.00323926	2
EPAS1	9.9263e-08	0.643812	0.787	0.584	0.00331747	2
FLOT2	9.95357e-08	0.623728	0.68	0.444	0.00332658	2
LITAF	1.05362e-07	0.366541	0.747	0.59	0.00352132	2
ACTR2	1.05918e-07	0.598272	0.853	0.682	0.00353987	2
MMP12	1.15978e-07	0.264078	0.147	0.025	0.00387611	2
RUNX3	1.16935e-07	0.323154	0.347	0.126	0.0039081	2
IFI35	1.17013e-07	0.579865	0.627	0.374	0.00391069	2
BMP1	1.19268e-07	0.492823	0.573	0.306	0.00398605	2
ADAM8	1.1962e-07	0.466942	0.387	0.155	0.00399781	2
WDFY4	1.23868e-07	0.448242	0.147	0.025	0.00413979	2
EIF2AK2	1.24474e-07	0.536252	0.587	0.317	0.00416003	2
C1QC	1.25307e-07	0.697721	0.387	0.161	0.0041879	2
ADAR	1.26278e-07	0.660473	0.773	0.602	0.00422033	2
TNIP1	1.28384e-07	0.58377	0.68	0.439	0.00429073	2
NID1	1.29845e-07	0.575099	0.547	0.299	0.00433956	2
SQOR	1.44655e-07	0.504271	0.787	0.602	0.00483453	2
TRAC	1.44687e-07	0.785174	0.44	0.209	0.00483559	2
CALU	1.46722e-07	0.489504	0.693	0.466	0.00490361	2
CCDC69	1.4751e-07	0.425452	0.253	0.073	0.00492993	2
RELB	1.4798e-07	0.532533	0.373	0.157	0.00494564	2
OPTN	1.56566e-07	0.438965	0.733	0.574	0.0052326	2
ITGAV	1.57391e-07	0.516246	0.707	0.546	0.00526015	2
TFPI	1.58578e-07	0.619141	0.293	0.097	0.00529984	2
PARP14	1.63527e-07	0.583612	0.587	0.354	0.00546525	2
PSMB3	1.73426e-07	0.384404	0.893	0.75	0.00579607	2
CRIP2	1.82075e-07	0.649005	0.6	0.357	0.00608511	2
ANTXR2	1.82251e-07	0.338389	0.293	0.099	0.00609102	2
GPSM3	1.93848e-07	0.316194	0.2	0.049	0.00647858	2
JPT1	1.97592e-07	0.571434	0.867	0.692	0.00660371	2
IKBIP	2.06273e-07	0.335443	0.267	0.084	0.00689386	2
GBP2	2.11277e-07	0.540077	0.76	0.505	0.0070611	2
BIRC3	2.15647e-07	0.509224	0.213	0.055	0.00720714	2
CXCL12	2.18181e-07	0.49285	0.28	0.088	0.00729183	2
HLA-DMA	2.20913e-07	0.642171	0.533	0.293	0.00738314	2
CEMIP2	2.28918e-07	0.26926	0.267	0.081	0.00765068	2
LAMB1	2.29318e-07	0.50006	0.587	0.351	0.00766404	2
CRISPLD2	2.35842e-07	0.596992	0.493	0.245	0.00788207	2
LHFPL2	2.38806e-07	0.252155	0.333	0.121	0.00798114	2
CAVIN1	2.42932e-07	0.657173	0.707	0.477	0.00811902	2
CAV2	2.48867e-07	0.4836	0.733	0.546	0.00831739	2
AES	2.491e-07	0.556873	0.813	0.665	0.00832518	2
GNAS	2.5052e-07	0.461831	0.947	0.797	0.00837261	2
AGRN	2.54192e-07	0.613252	0.707	0.505	0.00849537	2
IGHG3	2.59466e-07	0.626037	0.573	0.327	0.00867161	2
SHISA5	2.61989e-07	0.560714	0.773	0.564	0.00875594	2
ITM2C	2.74472e-07	0.560695	0.347	0.133	0.00917312	2
JUND	2.83881e-07	0.534231	0.827	0.631	0.00948757	2
FBLN2	2.84769e-07	0.396671	0.413	0.178	0.00951726	2
SP100	2.84799e-07	0.46622	0.693	0.457	0.00951827	2
IL10RA	2.86599e-07	0.400097	0.227	0.063	0.00957843	2
TNS3	2.90596e-07	0.378091	0.267	0.087	0.009712	2
MMRN1	2.91319e-07	0.425438	0.187	0.043	0.00973616	2
MARCKS	2.97625e-07	0.402677	0.893	0.695	0.00994694	2
RGS16	2.97892e-07	0.293235	0.187	0.043	0.00995586	2
ITGA1	3.1143e-07	0.283458	0.24	0.069	0.0104083	2
PARP10	3.16192e-07	0.446909	0.4	0.178	0.0105675	2
CCDC80	3.20145e-07	0.316107	0.347	0.127	0.0106996	2
FPR3	3.20906e-07	0.528514	0.24	0.072	0.010725	2
CCNI	3.25636e-07	0.37489	0.773	0.559	0.0108831	2
PLAU	3.27414e-07	0.659573	0.68	0.502	0.0109425	2
CD3E	3.35348e-07	0.290911	0.24	0.069	0.0112077	2
LAMTOR1	3.55054e-07	0.462055	0.827	0.67	0.0118663	2
DDX23	4.03427e-07	0.514403	0.587	0.363	0.0134829	2
C19orf66	4.07094e-07	0.402086	0.64	0.393	0.0136055	2
DENND3	4.17789e-07	0.272992	0.187	0.045	0.0139629	2
SOCS1	4.28683e-07	0.321356	0.307	0.111	0.014327	2
IGFBP6	4.32631e-07	0.771567	0.72	0.478	0.014459	2
DNAJA1	4.34888e-07	0.452577	0.76	0.595	0.0145344	2
NFATC2IP	4.38316e-07	0.528064	0.413	0.188	0.0146489	2
RASSF2	4.40449e-07	0.347344	0.267	0.087	0.0147203	2
ZEB2	4.45391e-07	0.403041	0.267	0.087	0.0148854	2
SEL1L3	4.71354e-07	0.397896	0.307	0.115	0.0157531	2
LAMA3	4.85699e-07	0.774053	0.613	0.422	0.0162326	2
PTGFRN	4.89139e-07	0.610814	0.72	0.589	0.0163475	2
CAVIN3	5.02108e-07	0.438224	0.547	0.299	0.0167809	2
XAF1	5.09758e-07	0.399959	0.507	0.262	0.0170366	2
RRBP1	5.27531e-07	0.505083	0.72	0.553	0.0176306	2
ADGRL4	5.36659e-07	0.362428	0.24	0.07	0.0179357	2
F3	5.7014e-07	0.857465	0.627	0.408	0.0190547	2
SERPINB9	5.75946e-07	0.597707	0.493	0.257	0.0192487	2
SDCBP	5.76454e-07	0.570137	0.68	0.463	0.0192657	2
PDP1	5.80382e-07	0.477624	0.453	0.238	0.0193969	2
CD68	5.87204e-07	0.414963	0.44	0.2	0.019625	2
TBX2	5.90971e-07	0.282121	0.187	0.045	0.0197508	2
MICAL2	5.9542e-07	0.338701	0.36	0.149	0.0198995	2
AHR	6.08871e-07	0.647544	0.627	0.383	0.0203491	2
RSAD2	6.26506e-07	0.744439	0.667	0.417	0.0209384	2
MYO1G	6.48706e-07	0.293633	0.24	0.073	0.0216804	2
EVA1B	6.59344e-07	0.447483	0.427	0.2	0.0220359	2
ATP13A3	6.64942e-07	0.353612	0.427	0.202	0.022223	2
ACKR1	6.66657e-07	0.319627	0.16	0.033	0.0222804	2
IGFBP2	6.68973e-07	0.445921	0.627	0.338	0.0223577	2
PXDN	6.80864e-07	0.4076	0.333	0.129	0.0227552	2
ITGB2	6.85048e-07	0.438072	0.387	0.173	0.022895	2
RRAS	7.00407e-07	0.337419	0.413	0.182	0.0234083	2
NUP62	7.1429e-07	0.45788	0.52	0.293	0.0238723	2
MAN1A1	7.51665e-07	0.546088	0.507	0.272	0.0251214	2
MGP	7.72592e-07	0.640806	0.347	0.139	0.0258208	2
LTBP1	7.73555e-07	0.341656	0.6	0.351	0.025853	2
SIRPA	7.85003e-07	0.497122	0.6	0.392	0.0262356	2
FSTL3	8.40521e-07	0.283207	0.413	0.181	0.028091	2
RRAD	8.57056e-07	0.374851	0.293	0.1	0.0286437	2
[truncated: 2,112 more rows]
